# Supplementary material for: Obtaining filamentous fungi and lipases from sewage treatment plant residue for fat degradation in anaerobic reactors
Source: PeerJ journal article supplement (doi:10.7717/peerj.5368), 2018-08-14
Supplement: FASTA_MI003_MI004.pdf [file FASTA_MI003_MI004.pdf]

>MI003\_B sequence exported **fumigatus**

AGGAWCCCTAACCTGATCGAGGTCACCTTAGAAAATAAAGTTGGGTGTCGGCTGGCGCCG  
GCCGGGCCTACAGAGCAGGTGACAAAGCCCCATACGCTCGAGGACCGGACGCGGTGCCGC  
CGCTGCCTTTGGGCCCCTCCCCGGGAGAGGGGGACGGGGGCCAACACACAAGCCGTG  
CTTGAGGGCAGCAATGACGCTCGGACAGGCATGCCCCCGAATACCAGGGGCGCATGTGC  
GTTCAAAGACTCGATGATTCACTGATTCTGCAWTCACATTACTTATCSTTTGCTGCGT  
TCTCATCGATGCCGAACAAAATCCGTTGTTGAAGTTTACTGATWCRAAWYACTCAA

>MI004\_F sequence exported **terreus**

CSGGGWWYCAWWCCTTGATCCGAGGTCAACCTGGAAAAACAAGTTGCAAATAAATGCG  
TCGGCGGGCGCCGGCCGGCCTACGGAGCGGAAGACGAAGCCCCATACGCTCGAGGACCG  
GACGCGGTGCCCGCTGCCTTTGGGCCCCTCCCCGGGAGCCGGGGGACGAGGGCCCA  
ACACACAAGCCGGGCTTGAGGGCAGCAATGACGCTCGGACAGGCATGCCCCCGAATAC  
CAGGGGGCGCAATGTGCGTTCAAAGACTCGATGATTCACTGAATTCTGCAATTCACATTA  
GTTATCGCATTTGCTGCGTTCTTCATCGATGCCGAACCAAGAGATCCATTGTTGAAAG  
TTTTAACTGATTGCAAAGAATCACACTCAGACTGCAAGCTTTCAGAACAGGGTTCATGTT  
GGGGTCTCCGGCGGGCACGGGCCCGGGGGCGAGTCGCCCCCGGCGGCCAGCAACGCTGG  
CGGGCCCCCGAAGCAACAAGGTACAATAGTCACGGGTGGGAGGTTGGGCCATAAAGACC  
CGCACTCGGTAATGATCCTTCCGCAGGTTACCTACGGGAAAS
