# Supplementary material for: Obtaining filamentous fungi and lipases from sewage treatment plant residue for fat degradation in anaerobic reactors
Source: PeerJ journal article supplement (doi:10.7717/peerj.5368), 2018-08-14
Supplement: MC003-15_MicroID_AnnaPinheiro.pdf [file MC003-15_MicroID_AnnaPinheiro.pdf]

## Test Results Based on Sanger Sequencing

### Identification of microorganisms -MicroID

Sample: **M5.**

Client: **Fundação Coppetec.**

Contact: **Anna Cristina P de Lima.**

Report: **MC003/2015.**

Internal code: **MC 003/15.**

Date Received: **03/30/2015**

Report Date: **04/08/2015**

#### Result

The sequenced microorganism shows 95% identity with the fungus *Aspergillus fumigatus*.

#### Interpretation

The microorganism sequence obtained was compared to a DNA database. The result of this comparison demonstrated greater identity of the sample with the fungus *Aspergillus fumigatus*.

#### Methodology

Automatic sequencing by capillary electrophoresis on the ABI 3500 *Genetic Analyzer* (Applied Biosystems) and alignment of the nucleotide sequences produced with the reference sequences deposited in *GenBank*.

#### Considerations

Although the genomic region used for identification among the species is an international standard for this analysis<sup>1</sup>, one should not rule out the identification of more than one species per sample due to the similarity between the DNAs of the species found.

#### References

1) *Fungal Barcoding Consortium* et al, 2011.
