# Supplementary material for: Obtaining filamentous fungi and lipases from sewage treatment plant residue for fat degradation in anaerobic reactors
Source: PeerJ. 2018 Aug 14;6:e5368. doi: 10.7717/peerj.5368 (PMC6097491; doi:10.7717/peerj.5368)
Supplement: Supplemental Information 4 — Results of analyses of protein, carbohydrate, O&G, pH, and humidity of residues from Sewage Treatment Plant (STP). [file peerj-06-5368-s004.xlsx]

## Sheet: Protein
	Date: 01/04/2014
	Sample	Mass (g)	Volume NaOH (mL)		Dilution factor	3
	P1	0.1017	20
	P2	0.103
	P3	0.1006
		Sample	Concentration g/L			Protein calculation (wet weight)				Protein calculation (dry weight)
		P11	0.053			P1	0.164	g/L		Moisture (%)	30.2
		P12	0.054				0.00328	g/20mL		100 g	30,2 g water
		P13	0.057				32.2517	mg/g		Dry weight	69.8
		Average	0.0546667
						P2	0.171	g/L		P1 (mg/g)	46.2059
		P21	0.057				0.00342	g/20mL		P2 (mg/g)	47.57
		P22	0.06				33.2039	mg/g		P3 (mg/g)	45.5718
		P23	0.054
		Average	0.057			P3	0.16	g/L		P (mg/g)	46.2059	mg/g
							0.0032	g/20mL		SD	0.747183
		P31	0.055				31.8091	mg/g
		P32	0.052
		P33	0.053
		Average	0.0533333

## Sheet: Carbohydrate
	Data: 03/04/2014
	Mass (g)	Volume (mL)			Sample	Concentration mg/L Eq. Glucose
	0.5324	100			C1	4
					C2	4
	Diluition				C3	4
	Alíquot (mL)	Volume (mL)			Average	4
	1	25			Standard deviation	0
	Dilution factor	250
					Carbohydrate calculation (wet weight)				Carbohydrate calculation (dry weight)
									Moisture (%)	30.2
					Média	100	mg/L		100 g	30,2 g water
						10	mg/100mL		Dry weight	69.8
					Carbohydrate	0.0187829	mg/g
									P1 (mg/g)	0.0269096
					ml	mg	g
					100	10	0.5		Carbohydrate (mg/g)	0.0269096
						x			SD

## Sheet: pH-Umid
	pH			Moisture
	Data: 03/04/2014			Data: 03/04/2014
	pH	5.21		Samples	Moisture (%)
				U1	28.7
				U2	29.3
				U3	32.7
				Average	30.2333
				Standard deviation	2.15716

## Sheet: O&G
	Amostra: Escuma
	Data: 20/05/2014
	Samples	Mass (g)
	A1	4.0273
	A2	4.0973			Oils and Grease (O&G)
					Samples	mg/g oil and grease
					A1	144.861
					A2	151.807
					Average	148.334
	Balão				Standard deviation	4.91154
	Amostra	Massa Inicial (g)	Massa Final (g)
	B1	104.411	104.994
	B2	133.25	133.873
					O&G calculation (wet weight)				O&G calculation (dry weight)
					A1	144.861	mg/g		Moisture (%)	30.2
					A2	151.807	mg/g		100 g	30,2 g água
									Dry weight	69.8
									A1 (mg/g)	207.538
									A2 (mg/g)	217.489
									O&G (mg/g)	212.513	mg/g
									SD	4.97562
