# Supplementary material for: Obtaining filamentous fungi and lipases from sewage treatment plant residue for fat degradation in anaerobic reactors
Source: PeerJ. 2018 Aug 14;6:e5368. doi: 10.7717/peerj.5368 (PMC6097491; doi:10.7717/peerj.5368)
Supplement: Supplemental Information 5 — Results of chemical oxygen demand (COD), biogas volume and composition during anaerobic biodegradability tests with raw and hydrolyzed scum. [file peerj-06-5368-s005.xlsx]

## Sheet: COD initial
	VSS sludge (mg/L)		19000		Total COD (mg/L)		2900
								Initial
	ID.	Condition		Sludge (mL)	Sewage (mL)	Crude Scum (mL)	Hydrolyzed Scum (mL)	Total COD (mg/L)	Soluble COD (mg/L)
		Condition	Samples
	1 a 5	1	Raw sewage	15	75			135	49
	6 a 10	2 (1%)	Control	15	74.1	0.9		176.249	49.228
	11 e 12		Sample	15	74.1		0.9	177.469	56.204
	16 a 20	3 (5%)	Control	15	70.5	4.5		339.913	50.14
	21 a 22		Sample	15	70.5		4.5	346.013	85.02
	26 a 28	4 (10%)	Control	15	66	9		544.493	51.28
	31 a 32		Sample	15	66		9	556.693	121.04
	36 a 38	5	SLUDGE	15	BUFFER (pH 7) 75 mL
	39 a 41	6	Raw sewage	15	75			135	49
	42 a 44	7 (10%)	Control	15	66	9		544.493	51.28
	45 a 47		Sample	15	66		9	556.693	121.04
	48 a 50	8 (25%)	Control	15	52.5	22.5		1158.23	54.7
	51 a 53		Sample	15	52.5		22.5	1188.73	229.1
	54 a 56	9 (50%)	Control	15	30	45		2181.13	60.4
	57 a 59		Sample	15	30		45	2242.13	409.2
	60 a 62	10 (75%)	Control	15	7.5	67.5		3204.03	66.1
	66 a 68		Sample	15	7.5		67.5	3295.53	589.3
	66 a 68	11 (100%)	Control	15		75		3545	68
	66 a 68		Sample	15			75	3646.67	649.333
	INITIAL
	Total COD					SOLUBLE COD
	Sample	Dilution	COD without dilution	COD (mgO2/L)		Sample	Dilution	COD without dilution	COD (mgO2/L)
	Raw sewage	1	137	135.333		Raw sewage	1	50	49
		1	139				1	48
		1	130				1	71
	Average		135.333			Average		49
	Standard deviation		4.72582			Standard deviation		1.41421
	Crude Scum	10	1240	3545		Crude Scum	2	70	68
		10	2830				2	62
		10	4260				2	72
	Average		3545			Average		68
	Standard deviation		1011.16			Standard deviation		5.2915
	Hydrolyzed Scum	10	3760	3646.67		Hydrolyzed Scum	2	646	649.333
		10	3700				2	660
		10	3480				2	642
	Average		3646.67			Average		649.333
	Standard deviation		147.422			Standard deviation		9.45163

## Sheet: COD final
	Sample	INITIAL CONDITION					TOTAL COD				SOLUBLE COD					% TOTAL COD REMOVAL			pH			FINAL CONDITION
		TOTAL COD (mg/L)	SOLUBLE COD (mg/L)		SAMPLE		Dilution	COD without dilution	COD (mgO2/L)			Dilution	COD without dilution	COD (mgO2/L)								Sample	pH	SD	TOTAL COD (mg/L)	SD	SOLUBLE COD (mg/L)	SD	% TOTAL COD REMOVAL	SD
	Raw sewage	135	56		RAW SEWAGE	1		48	48		1		14	14				1		7.13		Raw sewage	7.202	0	51.9667	3.91351	19.5333	4.53431	60.9877	2.8989
	Crude 1%	139.191	47.0611					48	48				14	14				2		7.24		Crude 1%	7.2	0.1	46	8.62297	18	3.47691	66.9519	6.19506
	Hydrolyzed 1%	147.891	52.8744					64	64				14	14				3		7.19		Hydrolyzed 1%	7.1	0	40.6667	5.18545	14	1.41421	72.5023	3.50626
	Crude 5%	244.844	47.5278			Mean			53.3333		Mean			14		60.4938		4		7.25		Crude 5%	7	0.1	52.6667	6.45239	17	8.82185	78.4897	2.6353
	Hydrolyzed 5%	288.344	76.5944			DP			9.2376		DP			0				5		7.2		Hydrolyzed 5%	6.9	0.1	67.3333	3.77124	20	3.77124	76.6483	1.30789
	Crude 10%	376.911	48.1111			2		51	51		2		12	12					Average	7.202		Crude 10%	6.9	0.2	61.3333	4.35039	26.6667	0.925185	83.7274	1.15422
	Hydrolyzed 10%	463.911	106.244					56	56				5	5					SD	0.0476445		Hydrolyzed 10%	7.1	0.1	89.8333	13.9064	43.5	6.36396	80.6357	2.99765
	SLUDGE							51	51				18	18								SLUDGE	7.52	0	85	0.353553	52.3333	4.30224
	Raw sewage	135	56			Mean			52.6667		Mean			15		60.9877						Raw sewage	7.53	0.1	100.333	10.2632	43.3333	2.61583	28.642	7.40741
	Crude 10%	376.911	48.1111			DP			2.88675		DP			4.24264								Crude 10%	7.46	0	83	11.0872	32	3.45281	77.9789	2.94159
	Hydrolyzed 10%	463.911	106.244			3		12	12		3		23	23								Hydrolyzed 10%	7.67	0	145	4.52565	50	10.6319	68.744	0.975542
	Crude 25%	773.111	49.8611					44	44				38	38								Crude 25%	7.59	0.1	132.667	15.728	41	12.1853	82.8399	2.03438
	Hydrolyzed 25%	990.611	195.194					55	55				18	18								Hydrolyzed 25%	7.66	0.1	227	33.2955	77	45.3468	77.0849	3.36111
	Crude 50%	1433.44	52.7778			Mean			49.5		Mean			26.3333		63.3333						Crude 50%	7.55	0	267.667	25.391	65	16.0981	81.327	1.77133
	Hydrolyzed 50%	1868.44	343.444			DP			7.77817		DP			10.4083								Hydrolyzed 50%	7.54	0	430	29.6704	57	2.14303	76.9862	1.58797
	Crude 75%	2093.78	55.6944			4		45	45		4		17	17								Crude 75%	7.55	0.1	246.667	54.9326	72	18.1179	88.2191	2.62361
	Hydrolyzed 75%	2746.28	491.694					47	47				18	18								Hydrolyzed 75%	7.49	0	600	13.2288	193	20.3005	78.1522	0.481698
	Crude 100%	2313.89	56.6667					47	47				28	28								Crude 100%	7.44	0.1	410	29.7714	61	29.5654	82.2809	1.28664
	Hydrolyzed 100%	3038.89	541.111			Mean			46.3333		Mean			21		65.679						Hydrolyzed 100%	7.53	0	748.333	134.35	216.167	44.5477	75.3748	4.42103
						DP			1.1547		DP			6.08276
						5		32	32		5		21	21
								71	71				18	18
								45	45				25	25
						Mean			58		Mean			21.3333		57.037			pH
						DP			18.3848		DP			3.51188
						Mean			51.6923					19.8571		61.5062
						DP			8.03518					6.90437		3.24106
					CRUDE 1%	6		59	59		6		3	3				6		7.04
								39	39				24	24				7		7.19
								65	65				12	12				8		7.11
						Mean			62		Mean			18		55.4569		9		7.28
						DP			4.24264		DP			8.48528				10		7.16
						7		48	48		7		25	25					Average	7.156
								41	41				17	17					SD	0.0896103
								43	43				12	12
						Mean			44		Mean			18		68.3888
						DP			3.60555		DP			6.55744
						8		44	44		8		28	28
								65	65				25	25
								48	48				17	17
						Mean			46		Mean			23.3333		66.9519
						DP			2.82843		DP			5.68624
						9		48	48		9		21	21
								38	38				25	25
								44	44				16	16
						Mean			43.3333		Mean			20.6667		68.8677
						DP			5.03322		DP			4.50925
						10		53	53		10		27	27
								58	58				20	20
								62	62				8	8
						Mean			57.6667		Mean			14		58.5702
						DP			4.50925		DP			8.48528					pH
						Média			50.0769					21.2667		63.6471
						DP			8.56798					5.2978		6.19506
					Hidro. 1%	11		35	35		11		12	12
								39	39				15	15				11		7.1
								37	37				12	12				12		7.05
						Mean			37		Mean			13		74.9816			Average	7.075
						DP			2		DP			1.73205					SD	0.0353553
						12		47	47		12		5	5
								44	44				14	14
								42	42				16	16
						Mean			44.3333		Mean			15		70.023			pH
						DP			2.51661		DP			1.41421
						Mean			40.6667					13.8		72.5023
						DP			4.50185					1.78885		3.50626
					CRUDE 5%	16		56	56		16		16	16				16		6.96
								50	50				14	14				17		6.94
								69	69				21	21				18		6.97
						Mean			58.3333		Mean			17		76.1753		19		7.04
						DP			9.71253		DP			3.60555				20		6.89
						17		57	57		17		22	22					Average	6.96
								61	61				14	14					SD	0.0543139
								61	61				15	15
						Mean			59.6667		Mean			17		75.6308
						DP			2.3094		DP			4.3589
						18		49	49		18		9	9
								56	56				16	16
								52	52				14	14
						Mean			52.3333		Mean			15		78.6259
						DP			3.51188		DP			1.41421
						19		57	57		19		20	20
								49	49				27	27
								52	52				3	3
						Mean			52.6667		Mean			23.5		78.4897
						DP			4.04145		DP			4.94975
						20		46	46		20		40	40
								37	37				33	33
								47	47					0
						Mean			43.3333		Mean			36.5		82.3017			pH
						DP			5.50757		DP			4.94975
						Mean			53.2667					21		78.2447
						DP			7.63887					8.39913		2.6353
					Hidro. 5%	21		65	65		21		27	27				21		6.91
								68	68				24	24				22		6.83
								77	77				17	17					Average	6.87
						Mean			70		Mean			22.6667		75.7235			SD	0.0565685
						DP			6.245		DP			5.1316
						22		72	72		22		21	21
								59	59				11	11
								63	63				20	20
						Mean			64.6667		Mean			17.3333		77.5731			pH
						DP			6.65833		DP			5.50757
						Média			67.3333					20		76.6483
						DP			6.47045					5.5857		1.30789
					CRUDE 10%	26		63	63		26		30	30				26		6.93
								63	63				22	22				27		6.66
								58	58				24	24				28		7.14
						Mean			61.3333		Mean			25.3333		83.7274			Average	6.91
						DP			2.88675		DP			4.16333					SD	0.240624
						27		57	57		27		25	25
								58	58				27	27
								54	54				28	28
						Mean			56.3333		Mean			26.6667		85.0539
						DP			2.08167		DP			1.52753
						28		66	66		28		32	32
								69	69				27	27
								60	60				29	29
						Mean			65		Mean			27.1111		82.7546			pH
						DP			4.58258		DP			3.10018
						Média			60.8889					27.1111		83.8453
						DP			4.75511					3.10018		1.15422
					Hidro. 10%	31		82	82		31		39	39				31		7
								76	76				40	40				32		7.2
								82	82				38	38					Average	7.1
						Mean			80		Mean			39		82.7553			SD	0.141421
						DP			3.4641		DP			1
						32		101	101		32		45	45
								97	97				48	48
								101	101				51	51
						Mean			99.6667		Mean			48		78.516			pH
						DP			2.3094		DP			3
						Média			89.8333					43.5		80.6357
						DP			11.089					5.31977		2.99765
					SLUDGE	36		154	154		36		57	57				36		7.5
								88	88				44	44				37		7.54
								82	82				56	56				38		7.51
						Mean			85		Mean			52.3333					Average	7.51667
						DP			4.24264		DP			7.23418					SD	0.0208167
						37		126	126		37		40	40
								89	89				63	63
								80	80					0
						Mean			84.5		Mean			51.5
						DP			6.36396		DP			16.2635
						38		83	83		38		52	52
								88	88				57	57
								91	91				69	69
						Mean			87.3333		Mean			59.3333					pH
						DP			4.04145		DP			8.73689
						Média			85.8571					54.75
						DP			4.14039					9.43777
					RAW SEWAGE	39		102	102		39		32	32				39		7.52
								94	94				17	17				40		7.48
								123	123				47	47				41		7.58
						Mean			106.333		Mean			39.5		21.2346			Average	7.52667
						DP			14.9778		DP			15					SD	0.0503322
						40		82	82		40		36	36
								81	81				45	45
								96	96				49	49
						Mean			86.3333		Mean			43.3333		36.0494
						DP			8.3865		DP			6.65833
						41		96	96		41		34	34
								115	115				56	56
								90	90				57	57
						Mean			100.333		Mean			44.5		28.642			pH
						DP			13.0512		DP			9.66585		10.4757
						Média			97.6667					37.0553
						DP			13.9732					24.5295
					CRUDE 10%	42		75	75		42		26	26				42		7.43
								90	90				34	34				43		7.47
								84	84				36	36				44		7.48
						Mean			83		Mean			32		77.9789			Average	7.46
						DP			7.54983		DP			5.2915					SD	0.0264575
						43		103	103		43		33	33
								101	101				39	39
								95	95					0
						Mean			99.6667		Mean			36		73.557
						DP			4.16333		DP			4.24264
						44		73	73		44		16	16
								81	81				21	21
								82	82				28	28
						Mean			78.6667		Mean			29.125		79.1286			pH
						DP			4.93288		DP			7.8638
						Mean			87.1111		Mean			29.125		76.8882
						DP			10.8102		DP			11.9636		2.94159
					Hidro. 10%	45		138	138		45		37	37				45		7.65
								153	153				36	36				46		7.66
								145	145				59	59				47		7.71
						Mean			145.333		Mean			44		68.6722			Average	7.67333
						DP			7.50555		DP			13					SD	0.0321455
						46		135	135		46		68	68
								139	139				68	68
								138	138				58	58
						Mean			137.333		Mean			64.6667		70.3966
						DP			2.08167		DP			5.7735
						47		146	146		47		55	55
								143	143				47	47
								146	146				48	48
						Mean			145		Mean			50		68.744			pH
						DP			1.73205		DP			4.3589
						Mean			141.167		Mean			57.3333		69.2709
						DP			4.53505		DP			9.24482		0.975542
					CRUDE 25%	48		135	135		48		24	24				48		7.54
								131	131				29	29				49		7.55
								132	132				30	30				50		7.67
						Mean			132.667		Mean			27.6667		82.8399			Average	7.58667
						DP			2.08167		DP			3.21455					SD	0.0723418
						49		129	129		49		59	59
								128	128				53	53
								134	134				44	44
						Mean			130.333		Mean			52		83.1417
						DP			3.21455		DP			7.54983
						50		152	152		50		40	40
								166	166				39	39
								158	158				44	44
						Mean			158.667		Mean			41		79.4769			pH
						DP			7.02377		DP			2.64575
						Mean			140.556		Mean			40.2222		81.8195
						DP			14.196		DP			11.3993		2.03438
					Hidro. 25%	51		205	205		51		77	77				51		7.56
								201	201				76	76				52		7.69
								199	199				78	78				53		7.72
						Mean			201.667		Mean			77		79.6422			Average	7.65667
						DP			3.05505		DP			1					SD	0.085049
						52		229	229		52		84	84
								224	224				74	74
								228	228				82	82
						Mean			227		Mean			80		77.0849
						DP			2.64575		DP			5.2915
						53		261	261		53			0
								281	281					0
								261	261					0
						Mean			267.667		Mean			0		72.9796			pH
						DP			11.547		DP			0
						Média			232.111		Média			78.5		76.5689
						DP			29.4765		DP			3.78153		3.36111
					CRUDE 50%	54		294	294		54		65	65				54		7.58
								312	312				74	74				55		7.56
								299	299				68	68				56		7.51
						Mean			301.667		Mean			69		78.9551			Average	7.55
						DP			9.29157		DP			4.58258					SD	0.0360555
						55		278	278		55		38	38
								268	268				39	39
								257	257				41	41
						Mean			267.667		Mean			39.3333		81.327
						DP			10.504		DP			1.52753
						56		260	260		56		64	64
								245	245				67	67
								251	251				64	64
						Mean			252		Mean			65		82.42			pH
						DP			7.54983		DP			1.73205
						Mean			273.778		Mean			57.7778		80.9007
						DP			23.3868		DP			14.1755		1.77133
					Hidro. 50%	57		493	493		57		57	57				57		7.56
								452	452				58	58				58		7.52
								480	480				58	58				59		7.55
						Mean			475		Mean			57.6667		74.5778			Average	7.54333
						DP			20.9523		DP			0.57735					SD	0.0208167
						58		451	451		58		55	55
								426	426				57	57
								413	413				59	59
						Mean			430		Mean			57		76.9862
						DP			19.3132		DP			2
						59		436	436		59		50	50
								409	409				57	57
								412	412				54	54
						Mean			419		Mean			53.6667		77.5749			pH
						DP			14.7986		DP			3.51188
						Mean			441.333		Mean			56.1111		76.3796
						DP			30.2985		DP			2.75882		1.58797
					CRUDE 75%	60	10	32	320		60		28	28				60		7.59
							10	25	250				79	79				61		7.45
							10	63	630				65	65				62		7.61
						Mean			285		Mean			72		86.3882			Average	7.55
						DP			49.4975		DP			9.89949					SD	0.087178
						61	10	30	300		61		97	97
							10	19	190				87	87
							10	25	250				123	123
						Mean			246.667		Mean			102.333		88.2191
						DP			55.0757		DP			18.5831
						62	10	11	110		62		72	72
							10	17	170				80	80
							10	25	250				58	58
						Mean			176.667		Mean			70		91.5623			pH
						DP			70.2377		DP			11.1355
						Mean			230		Mean			82.625		88.7232
						DP			69.4879		DP			20.3746		2.62361
					Hidro. 75%	63	10	73	730		63		188	188				63		7.51
							10	46	460				186	186				64		7.43
							10	177	1770				205	205				65		7.52
						Mean			595		Mean			193		78.3343			Average	7.48667
						DP			190.919		DP			10.4403					SD	0.0493288
						64	10	54	540		64		203	203
							10	60	600				215	215
							10	72	720				198	198
						Mean			620		Mean			205.333		77.424
						DP			91.6515		DP			8.73689
						65	10	55	550		65		167	167
							10	67	670				165	165
							10	58	580				165	165
						Mean			600		Mean			165.667		78.1522			pH
						DP			62.45		DP			1.1547
						Mean			606.25		Mean			188		77.9702
						DP			94.1029		DP			18.8613		0.481698
					CRUDE 100%	66	10	41	410		66		56	56				66		7.53
							10	19	190				67	67				67		7.35
							10	16	160				60	60				68		7.44
						Mean			410		Mean			61		82.2809			Average	7.44
						DP			0		DP			5.56776					SD	0.09
						67		402	402		67		55	55
								428	428				56	56
								409	409				56	56
						Mean			413		Mean			55.6667		82.1513
						DP			13.4536		DP			0.57735
						68	10	38	380		68		111	111
							10	37	370				97	97
							10	33	330				120	120
						Mean			360		Mean			109.333		84.4418			pH
						DP			26.4575		DP			11.5902
						Mean			389.857		Mean			75.3333		82.958
						DP			32.7843		DP			26.4008		1.28664
					Hidro. 100%	69	10	72	720		69		171	171				69		7.56
							10	54	540				175	175				70		7.49
							10	70	700				208	208					Average	7.525
						Mean			653.333		Mean			184.667		78.5009			SD	0.0494975
						DP			98.6577		DP			20.306
						70	10	85	850		70		241	241
							10	86	860				240	240
							10	82	820				262	262
						Mean			843.333		Mean			247.667		72.2486
						DP			20.8167		DP			12.4231
						Mean			748.333		Mean			216.167		75.3748
						DP			122.052		DP			37.6479		4.42103

## Sheet: Biogas vol
	SAMPLE		Time (days)
			Biogas (mL)
			1	2	3	4	5	6	7	8	9		SAMPLE	lag (d)	Vm(mL/d)	t stab (d)
	Raw sewage	1	1	1	3	3	3	7	7	8	8		Raw sewage	4.43	3.5	8
		3	0	0	1	1	1	4	4	5	5		Crude 1%	3.17	4.75	6
		Mean	0.5	0.5	2	2	2	5.5	5.5	6.5	6.5		Hydrolyzed 1%	4.83	3	6
		SD	0.707107	0.707107	1.41421	1.41421	1.41421	2.12132	2.12132	2.12132	2.12132		Crude 5%	4.3	5	6
	Crude 1%	6	0	0	1	1	1	4	4	4	4		Hydrolyzed 5%	4.29	7	6
		7	0	0	1	1	1	6	6	6	6		Crude 10%	4.4	10	8
		8	0	0	1	1	1	5	5	5	5		Hydrolyzed 10%	4.12	8.5	8
		10	0	0	2	2	2	7	7	7	7		Crude 25%	3.67	3	6
		Mean	4.75	4.75	5.5	5.5	5.5	8.5	8.5	8.5	8.5		Hydrolyzed 25%	3.25	4	6
		SD	0	0	0.5	0.5	0.5	1.29099	1.29099	1.29099	1.29099		Crude 50%	4.25	4	7
	Hydrolyzed 1%	11	1	1	1	1	1	3	3	3	3		Hydrolyzed 50%	3	6	7
		12	0	0	0	0	0	4	4	4	4		Crude 75%	3.25	4	>9
		Mean	0.5	0.5	0.5	0.5	0.5	3.5	3.5	3.5	3.5		Hydrolyzed 75%	3.18	3.67	>9
		SD	0.707107	0.707107	0.707107	0.707107	0.707107	0.707107	0.707107	0.707107	0.707107		Crude 100%	4.5	2	>9
	Crude 5%	16	0	0	3	3	3	9	9	9	9		Hydrolyzed 100%	2.17	6	>9
		17	0	0	4	4	4	9	10	10	10
		18	1	1	4	4	4	7	7	7	7		MIXTURE	lag (d)	Vm(mL/d)	t stab (d)
		19	0	0	3	3	3	9	9	9	9		Raw sewage	4.43	3.5	8
		Mean	0.25	0.25	3.5	3.5	3.5	8.5	8.75	8.75	8.75		Crude 100%	4.5	2	>9
		SD	0.5	0.5	0.57735	0.57735	0.57735	1	1.25831	1.25831	1.25831		Hydrolyzed 100%	2.17	6	>9
	Hydrolyzed 5%	21	1	2	5	5	5	12	12	12	12
		22	0	0	5	5	5	12	12	13	13
		Mean	0.5	1	5	5	5	12	12	12.5	12.5
		SD	0.707107	1.41421	0	0	0	0	0	0.707107	0.707107
	Crude 10%	26	1	1	6	6	6	16	17	18	18
		27	0	1	6	6	6	16	16	17	17
		28	1	2	7	7	7	17	17	18	18
		Mean	0.666667	1.33333	6.33333	6.33333	6.33333	16.3333	16.6667	17.6667	17.6667
		SD	0.57735	0.57735	0.57735	0.57735	0.57735	0.57735	0.57735	0.57735	0.57735
	Hydrolyzed 10%	31	1	3	9	9	9	18	18	19	19
		32	0	2	6	6	6	14	15	15	15
		Mean	0.5	2.5	7.5	7.5	7.5	16	16.5	17	17
		SD	0.707107	0.707107	2.12132	2.12132	2.12132	2.82843	2.12132	2.82843	2.82843
	Crude 25%	50	0	1	2	2	4	5	5	5
		Mean	0	1	2	2	4	5	5	5
		SD	0	0	0	0	0	0	0	0
	Hidrol. 25%	52	2	2	3	3	7	9	9	9
		53	1	2	3	3	9	10	10	10
		Mean	1.5	2	3	3	8	9.5	9.5	9.5
		SD	0.707107	0	0	0	1.41421	0.707107	0.707107	0.707107
	Crude 50%	54	0	0	1	1	3	6	7	7
		55	0	1	2	2	4	8	8	8
		Mean	0	0.5	1.5	1.5	3.5	7	7.5	7.5
		SD	0	0.707107	0.707107	0.707107	0.707107	1.41421	0.707107	0.707107
	Hidrol. 50%	57	1	1	4	4	10	14	15	15
		58	1	2	5	5	12	16	17	17
		59	1	5	8	8	15	19	20	20
		Mean	1	2.66667	5.66667	5.66667	12.3333	16.3333	17.3333	17.3333
		SD	0	2.08167	2.08167	2.08167	2.51661	2.51661	2.51661	2.51661
	Crude 75%	60	1	1	3	3	7	9	12	15	15
		62	1	1	1	1	2	2	6	8	10
		Mean	1	1	2	2	4.5	5.5	9	11.5	12.5
		SD	0	0	1.41421	1.41421	3.53553	4.94975	4.24264	4.94975	3.53553
	Hidrol. 75%	63	1	2	3	3	7	10	13	15	17
		65	2	3	5	5	11	15	19	22	23
		Mean	1.5	2.5	4	4	9	12.5	16	18.5	20
		SD	0.707107	0.707107	1.41421	1.41421	2.82843	3.53553	4.24264	4.94975	4.24264
	Crude 100%	66	0	1	1	1	1	2	4	5	6
		68	0	0	0	1	2	4	6	8	11
		Mean	0	0.5	0.5	1	1.5	3	5	6.5	8.5
		SD	0	0.707107	0.707107	0	0.707107	1.41421	1.41421	2.12132	3.53553
	Hidrol. 100%	69	1	5	10	11	17	21	25	27	28
		Mean	1	5	10	11	17	21	25	27	28
		SD

## Sheet: Biogas area
			Area									Percentage
			CH4	Corrected CH4	CO2	Corrected CO2	H2O	Corrected H2O	CH4	CO2	H2O	CH4	CO2	H2O
	Raw sewage	2	1445185	40645.8	615682	12803.4	1647104	50328.2	0.391664	0.123374	0.484963	39.1664	12.3374	48.4963
		3	191806	5394.54	388428	8077.54	1842510	56298.9	0.0773179	0.115772	0.80691	7.73179	11.5772	80.691
											Mean	23.4491	11.9573	64.5936
											SD	22.2276	0.537503	22.7651
	Crude 1%	6	769019	21628.7	767235	15955	932913	28505.7	0.327264	0.241416	0.43132	32.7264	24.1416	43.132
		8	849815	23901	516954	10750.3	1225289	37439.4	0.331541	0.149122	0.519337	33.1541	14.9122	51.9337
		10	331368	9319.73	493104	10254.3	1073500	32801.4	0.177941	0.195785	0.626274	17.7941	19.5785	62.6274
											Mean	27.8915	19.5441	52.5644
											SD	8.74727	4.61479	9.76299
	Hydrolyzed 1%	11	1053572	29631.7	569887	11851.1	1694855	51787.2	0.317698	0.127062	0.55524	31.7698	12.7062	55.524
		12	599019	16847.4	503495	10470.4	1520302	46453.7	0.228373	0.14193	0.629697	22.8373	14.193	62.9697
											Mean	27.3036	13.4496	59.2468
											SD	6.31625	1.05136	5.26489
	Crude 5%	16	28095926	790198	3978172	82727.9		0	0.905229	0.0947708	0	90.5229	9.47708	0
		17	2705966	76105.3	1056212	21964.4	1129847	34523.1	0.573978	0.165653	0.260369	57.3978	16.5653	26.0369
		20	9898656	278400	2005362	41702.4	948360	28977.7	0.797525	0.119464	0.0830116	79.7525	11.9464	8.30116
											Mean	75.891	12.6629	11.446
											SD	16.8968	3.59803	13.3003
	Hydrolyzed 5%	21	12433297	349686	2579250	53636.7	931976	28477	0.809834	0.124216	0.0659496	80.9834	12.4216	6.59496
		22	1090823	30679.4	659943	13723.8	757770	23154.1	0.454124	0.203143	0.342733	45.4124	20.3143	34.2733
											Mean	63.1979	16.368	20.4341
											SD	25.1525	5.58098	19.5715
	Crude 10%	26	30445618	856283	3800014	79023	530195	16200.4	0.899924	0.0830504	0.0170261	89.9924	8.30504	1.70261
		27	30003294	843843	4243734	88250.4	325423	9943.48	0.895764	0.0936804	0.0105553	89.5764	9.36804	1.05553
		28	11504680	323569	3078707	64023.1	821336	25096.4	0.784051	0.155137	0.0608119	78.4051	15.5137	6.08119
											Mean	85.9913	11.0622	2.94644
											SD	6.5731	3.8915	2.73398
	Hydrolyzed 10%	31	18254404	513405	2736181	56900.1	750237	22923.9	0.865441	0.0959159	0.0386426	86.5441	9.59159	3.86426
		32	10010555	281547	2133223	44361.3	652826	19947.5	0.814059	0.128265	0.0576757	81.4059	12.8265	5.76757
											Mean	83.975	11.2091	4.81591
											SD	3.6333	2.28746	1.34584
	Crude 25%	50	16556682	465657	6799019	141389	1804307	55131.6	0.703221	0.213521	0.0832581	70.3221	21.3521	8.32581
											Mean
											SD
	Hydrolyzed 25%	51	19997078	562418	4600229	95663.9	1619218	49476.1	0.794872	0.135203	0.0699252	79.4872	13.5203	6.99252
		52	28734238	808150	8879308	184649	1619040	49470.7	0.775375	0.177161	0.0474643	77.5375	17.7161	4.74643
											Mean	78.5123	15.6182	5.86948
											SD	1.37864	2.96686	1.58822
	Crude 50%	54	17109860	481215	8574693	178315	928554	28372.5	0.69954	0.259215	0.041245	69.954	25.9215	4.1245
		55	19482624	547949	9846520	204763	1915408	58526.4	0.675448	0.252408	0.0721445	67.5448	25.2408	7.21445
											Mean	68.7494	25.5812	5.66947
											SD	1.70358	0.481351	2.18493
	Hydrolyzed 50%	57	21991346	618507	8702214	180966	1303426	39826.9	0.736931	0.215616	0.0474525	73.6931	21.5616	4.74525
		57	21989300	618449	8617056	179196	1599680	48879.1	0.730575	0.211684	0.057741	73.0575	21.1684	5.7741
		58	24610928	692182	8670849	180314	1317448	40255.4	0.758347	0.19755	0.0441033	75.8347	19.755	4.41033
		58	24708332	694922	8673761	180375	516589	15784.7	0.779864	0.202422	0.0177141	77.9864	20.2422	1.77141
											Mean	75.1429	20.6818	4.17527
											SD	2.23715	0.829253	1.7044
	Crude 75%	62	26547028	746635	3445389	71648.4	1684519	51471.4	0.858443	0.0823777	0.0591792	85.8443	8.23777	5.91792
											Mean	85.8	8.23777	5.91792
											SD
	Hydrolyzed 75%	64	32913294	925686	15176351	315599	1497025	45742.4	0.719243	0.245215	0.0355411	71.9243	24.5215	3.55411
		65	38786328	1.09087e+06	14652494	304705	1713445	52355.3	0.753399	0.210443	0.0361588	75.3399	21.0443	3.61588
		65	38873748	1.09332e+06	14687312	305429	1570417	47985	0.755717	0.211116	0.0331677	75.5717	21.1116	3.31677
											Mean	74.2786	22.2258	3.49559
											SD	2.04215	1.98846	0.157911
	Crude 100%	66	19467420	547521		0	1469638	44905.6	0.924201	0	0.0757994	92.4201	0	7.57994
		68	2180724	61332.9	196238	4080.86	1758178	53722.1	0.514815	0.0342538	0.450932	51.4815	3.42538	45.0932
											Mean	71.9508	1.71269	26.3365
											SD	28.948	2.42211	26.5258
	Hydrolyzed 100%	69	40940600	1.15145e+06	16044151	333645	869991	26583.1	0.761704	0.220711	0.0175851	76.1704	22.0711	1.75851
		69	40975288	1.15243e+06	15955487	331802	775343	23691	0.76425	0.220039	0.015711	76.425	22.0039	1.5711
		69	40879648	1.14974e+06	15943357	331549	1798516	54954.7	0.74841	0.215818	0.0357721	74.841	21.5818	3.57721
											Mean	75.8121	21.8856	2.30227
											SD	0.850615	0.265233	1.1081

## Sheet: Table 
	% scum	Initial condition		Final condition					CODt removal (%)	SMP (mL CH4/g COD applied)
		Total COD (mgO2/L)	Soluble COD (mgO2/L)	pH	Total COD (mgO2/L)	Soluble COD (mgO2/L)	Biogas (mL, 30°C/1 atm)	CH4 (%)
	Raw sewage	135 ± 5	49 ± 1	7,4 ± 0,1	134 ± 13	90 ± 2	6,5 ± 2,1	23,4± 22,2	11,8 ± 8,3	133.4
	Crude 1%	176	49	7,5 ± 0,1	172 ± 11	82 ± 23	8,5 ± 1,3	27,9 ± 8,7	22,0 ± 4,8	143.7
	Hydrolyzed 1%	177	56	7,4 ± 0,1	216 ± 0	113 ± 10	3,5 ± 0,7	27,3 ± 6,3	5,7 ± 0,0	55.6
	Crude 5%	340	50	7,3 ± 0,1	116 ± 19	62 ± 3	8,8 ± 1,3	75,9 ± 16,9	76,6 ± 3,9	180.3
	Hydrolyzed 5%	346	85	7,2 ± 0,1	138 ± 10	80 ± 2	12,5 ± 0,7	63,2 ±25,2	74,3 ±1,8	195.8
	Crude 10%	544	51	7,4 ± 0,0	275 ± 11	241 ± 3	17,7 ± 0,6	86,0 ± 6,6	67,1 ± 8,5	242.5
	Hydrolyzed 10%	557	121	7,3 ± 0,1	458 ± 71	241 ± 6	17,0 ± 2,8	84,0 ± 3,6	50,4 ± 7,7	206.1
	Crude 25%	1158	55	7,6 ± 0,1	141 ± 14	40 ± 11	5	70.3	81,8 ± 2,0	40.5
	Hydrolyzed 25%	1189	229	7,7 ± 0,1	232 ± 29	79 ± 4	9,5 ±0,7	78,5 ±1,4	76,6 ± 3,4	83.6
	Crude 50%	2181	60	7,6 ± 0,0	274 ± 23	58 ± 14	7,5 ±0,7	68,7 ±1,7	80,9 ±1,8	31.5
	Hydrolyzed 50%	2242	409	7,5 ± 0,0	441 ± 30	56 ± 3	17,3 ±2,5	75,1 ±2,2	76,4 ± 1,6	77.3
	Crude 75%	3204	66	7,6 ± 0,1	230 ± 69	83 ± 20	12,5 ±3,5	85.8	88,7± 2,6	44.6
	Hydrolyzed 75%	3296	589	7,5 ± 0,0	606 ± 94	188 ± 19	20,0 ±4,2	74,3 ±2,0	78,0 ± 0,5	60.1
	Crude 100%	3545	68	7,4 ± 0,1	390 ± 33	75 ± 26	8,5 ±3,5	72,8 ±28,9	83,0 ± 1,3	23.3
	Hydrolyzed 100%	3647	649	7,5 ± 0,0	748 ± 122	216 ± 38	28	75,8 ±0,9	75,4 ± 4,4	77.6

## Sheet: Plan1
		SMP (mL CH4/gCOD appl)
		Hydrolysed		Control
	raw sewage			133.4
	1	55.6		143.7
	5	195.8		180.3
	10	206.1		242.5
	25	83.6		40.5
	50	77.3		31.5
	75	60.1		44.6
	100	77.6		23.3
			SMP			COD t final
		raw sewage	133.4			134
		5% Hydrolysed	195.8	increase of 46,8%		138
