# Supplementary material for: Obtaining filamentous fungi and lipases from sewage treatment plant residue for fat degradation in anaerobic reactors
Source: PeerJ. 2018 Aug 14;6:e5368. doi: 10.7717/peerj.5368 (PMC6097491; doi:10.7717/peerj.5368)
Supplement: Supplemental Information 6 — Results of enzymatic hydrolysis tests with 750 mgL−1 O&G: free acids production, and COD solubilization. [file peerj-06-5368-s006.xlsx]

## Sheet: Details
	Date of analysis: 28/07/2015
	Date of fermentation (SEP): 14/07/2015
	Enzymatic activity of SEP: 10,24 U/g
	Mass of the SEP used: 2,34 g
	O&G (sewage+scum): 750 mg/L

## Sheet: FA
	Date: 28/07/2015
	Normality NaOH		0.045
	Sample volume (mL)		20
	Amostra	Time (h)	Volume NaOH (mL)	Free acids (µmoles/mL)		Amostra	Time (h)	Volume NaOH (mL)	Free acids (µmoles/mL)
	Azide SEP	0	9.9	22.275		CONTROL AZIDE	0	3.5	7.875
			9.1	20.475				3.8	8.55
		Average		21.375			Average		8.2125
		Standard deviation		1.27279			Standard deviation		0.477297
		4	10.3	23.175		CONTROL SEP	0	4.1	9.225
			10.5	23.625				4	9
		Average		23.4			Average		9.1125
		Standard deviation		0.318198			Standard deviation		0.159099
		8	12	27
			12.2	27.45
		Average		27.225
		Standard deviation		0.318198
		24	11.4	25.65
			10.3	23.175
		Average		24.4125
		Standard deviation		1.75009
	SEP	0	7	15.75
			7.8	17.55
		Average		16.65
		Standard deviation		1.27279
		4	9.6	21.6
			9.3	20.925
		Average		21.2625
		Standard deviation		0.477297
		8	8.5	19.125
			8	18
		Average		18.5625
		Standard deviation		0.795495
		24	6	13.5
			5.4	12.15
		Average		12.825
		Standard deviation		0.954594

## Sheet: COD
	Date: 28/07/2015
		Total COD					Soluble COD
		Time (h)	Dilution	COD without dilution	COD (mgO2/L)		Time (h)	Dilution	COD without dilution	COD (mgO2/L)
	Azide control	0	100	156	10700		0	1	98	97
		0	100	90			0	1	97
		0	100	107			0	1	94
		Average		107			Average		97
		Standard deviation		34.2685			Standard deviation		2.08167
	Control	0	100	137	14100		0	1	145	149
		0	100	157			0	1	149
		0	100	141			0	1	149
		Average		141			Average		149
		Standard deviation		10.583			Standard deviation		2.3094
	Azide SEP	0	100	210	19300		0	10	352	3520
		0	100	193			0	10	367
		0	100	157			0	10	346
		Average		193			Average		352
		Standard deviation		27.0617			Standard deviation		10.8167
		4	100	198	26900		4	10	432	4220
		4	100	340			4	10	419
		4	100				4	10	422
		Average		269			Average		422
		Standard deviation		100.409			Standard deviation		6.80686
		8	100		29150		8	10	517	5240
		8	100	174			8	10	533
		8	100	409			8	10	524
		Average		291.5			Average		524
		Standard deviation		166.17			Standard deviation		8.02081
		24	100	278	29500		24	10	758	7410
		24	100	295			24	10	741
		24	100	296			24	10	722
		Average		295			Average		741
		Standard deviation		10.116			Standard deviation		18.0093
	SEP	0	100	164	18400		0	10	341	3230
		0	100	184			0	10	323
		0	100	194			0	10	318
		Average		184			Average		323
		Standard deviation		15.2753			Standard deviation		12.0968
		4	100	231	23500		4	10	394	3920
		4	100	435			4	10	392
		4	100	235			4	10	386
		Average		235			Average		392
		Standard deviation		116.642			Standard deviation		4.16333
		8	100	196	19600		8	10	215	2150
		8	100	287			8	10	226
		8	100	189			8	10	212
		Average		196			Average		215
		Standard deviation		54.6717			Standard deviation		7.37111
		24	100	180	19600		24	10	133	1330
		24	100	196			24	10	132
		24	100	203			24	10	143
		Average		196			Average		133
		Standard deviation		11.7898			Standard deviation		6.08276

## Sheet: Soluble carboh.
	Date: 28/07/2015
		Soluble carbohydrates						Soluble carbohydrates
		Time (h)	Dilution	Soluble carb. without dilution	Soluble carb. (mg/L)			Time (h)	Dilution	Soluble carb. without dilution	Soluble carb. (mg/L)
	azide control	0	10	5.8	63		Control	0	10	4.2	40
		0	10	7.2				0	10	4
		0	10	5.9				0	10	4
		Average		6.3				Average		4
		Standard deviation		0.781025				Standard deviation		0.11547
	Azide SEP	0	10	53.9	512.667		SEP	0	10	84.3	694
		0	10	47.6				0	10	69.4
		0	10	52.3				0	10	69.2
		Average		51.2667				Average		69.4
		Standard deviation		3.27465				Standard deviation		8.66083
		4	10	65.2	649			4	10	81.5	784
		4	10	61.6				4	10	78.4
		4	10	67.9				4	10	77.6
		Average		64.9				Average		78.4
		Standard deviation		3.1607				Standard deviation		2.05994
		8	10	63.1	641.667			8	10	42.5	441
		8	10	68.2				8	10	44.1
		8	10	61.2				8	10	63
		Average		64.1667				Average		44.1
		Standard deviation		3.61985				Standard deviation		11.4019
		24	10	92.9	907			24	10	23.9	235
		24	10	89.2				24	10	23.5
		24	10	90				24	10	23.4
		Average		90.7				Average		23.5
		Standard deviation		1.94679				Standard deviation		0.264575

## Sheet: VFA Alk
	Date: 10/06/2015
	Normality H2SO4		0.17
	Normality NaOH		0.08
	Sample volume (mL)		50
	Time (h)	pH	Volume H2SO4 (mL)	Volume NaOH (mL)	Alkalinity (mg/L, as CaCO3)	Volatile Fatty Acids (mg/L, as HAc)
	0 control	5.75	2		646	518.4
		4.3	1.8
		3.3	0.7
		4		3.6
		7
	0	5.75	2		850	849.6
		4.3	3
		3.3
		4		5.9
		7
	4 control	5.75	1.9		697	619.2
		4.3	2.2
		3.3	0.6
		4		4.3
		7
	4	5.75	1.8		799	878.4
		4.3	2.9
		3.3	1.4
		4		6.1
		7
