# Supplementary material for: Obtaining filamentous fungi and lipases from sewage treatment plant residue for fat degradation in anaerobic reactors
Source: PeerJ. 2018 Aug 14;6:e5368. doi: 10.7717/peerj.5368 (PMC6097491; doi:10.7717/peerj.5368)
Supplement: Supplemental Information 7 — Results of enzymatic hydrolysis tests with 3,000 mgL−1 O&G: free acids production, and COD solubilization. [file peerj-06-5368-s007.xlsx]

## Sheet: Details
	Date of analysis: 29/05/2015
	Date of fermentation (SEP): 24/05/2015
	Enzymatic activity of SEP: 18,2 U/g
	Mass of the SEP used: 1,3 g
	O&G (sewage+scum): 3000 mg/L

## Sheet: COD
	Date: 29/05/2015
		Total COD					Soluble COD
		Time (h)	Dilution	COD without dilution	CODO (mgO2/L)		Time (h)	Dilution	COD without dilution	COD (mgO2/L)
	Control	0	100	446	42800		0	50	124	5816.67
		0	100	467			0	50	113
		0	100	371			0	50	112
		Average		428			Average		116.333
		Standard deviation		50.4678			Standard deviation		6.65833
		0	100	314	32333.3		0	50	47	2083.33
		0	100	319			0	50	39
		0	100	337			0	50	39
		Average		323.333			Average		41.6667
		Standard deviation		12.0968			Standard deviation		4.6188
		4	100	281	27766.7		4	50	33	1916.67
		4	100	287			4	50	44
		4	100	265			4	50	38
		Average		277.667			Average		38.3333
		Standard deviation		11.3725			Standard deviation		5.50757

## Sheet: VFA Alk
	Date: 29/05/2015
	Normality H2SO4		0.09
	Normality NaOH		0.08
	Sample volume (mL)		50
	Time (h)	pH	Volume H2SO4 (mL)	Volume NaOH (mL)	Alkalinity (mg/L, as CaCO3)	Volatile Fatty Acids (mg/L, as HAc)
	O control	5.75	4.4		1503	1872
		4.3	12.3
		3.3
		4		13
		7
	O	5.75	4.7		1755	2577.6
		4.3	14.8
		3.3
		4		17.9
		7
	4	5.75	5.3		2079	2836.8
		4.3	17.8
		3.3
		4		19.7
		7

## Sheet: FA
	Data: 29/05/2015
	Normality NaOH		0.08
	Sample volume (mL)		10
	Time (h)	NaOH volume (mL)	Free acids (µmoles/mL)		Sample	Time(h)	Free acids (µmoles/mL)
	0 control	1.7	13.6		Controle	0	13.6
	0	1.9	15.2		Mistura	0	15.2
	4	2.8	22.4			4	22.4
