# Supplementary material for: Obtaining filamentous fungi and lipases from sewage treatment plant residue for fat degradation in anaerobic reactors
Source: PeerJ. 2018 Aug 14;6:e5368. doi: 10.7717/peerj.5368 (PMC6097491; doi:10.7717/peerj.5368)
Supplement: Supplemental Information 8 — Lipase activity by spectrophotometric methods, pH and moisture. [file peerj-06-5368-s008.xls]

## Sheet: Sheet1
1						2						withdrawal mass
0	0.0013	0.0012	0.0019			0	-0.0012	-0.0008	0.0014			initial	final
0.1	0.0033	0.0024	0.0027			0.1	-0.0009	-0.0007	0.0026		1	2.5	3.1
0.2	0.0031	0.0032	0.0041			0.2	0.0002	0.0005	0.0041		2	2.85	3.1
0.3	0.0041	0.0045	0.0055			0.3	0.0008	0.0019	0.0055		3	2.16	3.1
0.4	0.1205	-0.7712	-0.7618			0.4	-0.7793	-0.7712	-0.7766		4	2.85	3
0.5	-0.7889	0.1035	0.119			0.5	0.1188	0.0787	-0.7794
0.6	0.1555	0.1355	0.1382			0.6	0.1368	0.1395	0.1296			1
0.7	0.17	0.1529	0.1583			0.7	0.1534	0.1604	0.1488			Moisture			Mass
0.8	0.185	0.1703	0.1771			0.8	0.1707	0.1796	0.1687			Initial (%)	Final (%)		Initial (g)	Final (g)
0.9	0.1997	0.1878	0.1951			0.9	0.187	0.2001	0.1885			65.07	62.91		14.1267	12.977
1	0.2108	0.2026	0.2133			1	0.2015	0.221	0.208
1.1	0.2241	0.2188	0.2311			1.1	0.2189	0.2375	0.2268			2
1.2	0.238	0.2349	0.2489			1.2	0.2344	0.2562	0.246			Moisture			Mass
1.3	0.2498	0.2509	0.2662			1.3	0.2493	0.2748	0.2645			Initial (%)	Final (%)		Initial (g)	Final (g)
1.4	0.2626	0.2662	0.2836			1.4	0.2643	0.2932	0.2831			65.33	61.25		14.0119	12.8107
1.5	0.2749	0.2809	0.3005			1.5	0.2794	0.311	0.3016
1.6	0.2869	0.2954	0.3177			1.6	0.294	0.3289	0.3203			3
1.7	0.2983	0.3102	0.334			1.7	0.3083	0.3466	0.3375			Moisture			Mass
1.8	0.3097	0.3247	0.3502			1.8	0.3227	0.3639	0.3557			Initial (%)	Final (%)		Initial (g)	Final (g)
1.9	0.3212	0.3389	0.3678			1.9	0.3365	0.3811	0.3726			64.82	61.59		14.2401	13.0494
2	0.3325	0.3527	0.3824			2	0.3504	0.3982	0.3896
2.1	0.3434	0.3666	0.3975			2.1	0.3639	0.4151	0.4066			4
2.2	0.354	0.3796	0.4124			2.2	0.3776	0.4319	0.4232			Moisture			Mass
2.3	0.3639	0.3928	0.4274			2.3	0.3904	0.448	0.4397			Initial (%)	Final (%)		Initial (g)	Final (g)
2.4	0.3735	0.4061	0.4418			2.4	0.4036	0.4641	0.4563			65.22	59.37		14.0088	12.7899
2.5	0.3834	0.4189	0.4557			2.5	0.4159	0.48	0.4724
2.6	0.3929	0.4315	0.4698			2.6	0.4285	0.4956	0.4888
2.7	0.4023	0.4433	0.4836			2.7	0.4404	0.5109	0.5041
2.8	0.4118	0.4554	0.4973			2.8	0.4523	0.5263	0.5204
2.9	0.421	0.4667	0.5107			2.9	0.4643	0.5408	0.535
3	0.43	0.4784	0.5238			3	0.4757	0.5552	0.5499
3						3
0	0.0021	0.0059	0.0022			0	0.0012	0.0019	0
0.1	0.0022	0.0024	0.0031			0.1	0.0023	0.0038	-0.0001
0.2	0.0028	0.0033	0.0041			0.2	0.0034	0.0054	0.0004
0.3	0.0035	0.0048	0.0057			0.3	0.0043	0.0067	0.001
0.4	-0.7979	-0.7706	-0.7715			0.4	-0.7846	-0.7852	-0.7602
0.5	0.0959	0.0866	0.0848			0.5	-0.463	0.089	0.0987
0.6	0.1023	0.0938	0.0907			0.6	0.0991	0.0957	0.1011
0.7	0.1079	0.1002	0.0976			0.7	0.1055	0.1018	0.1042
0.8	0.1141	0.1073	0.1041			0.8	0.1116	0.1087	0.1065
0.9	0.1195	0.115	0.1113			0.9	0.1181	0.1144	0.1091
1	0.1234	0.1234	0.1178			1	0.1235	0.1208	0.1116
1.1	0.129	0.1298	0.1244			1.1	0.1294	0.1272	0.1141
1.2	0.133	0.1374	0.1313			1.2	0.1348	0.1338	0.117
1.3	0.138	0.1451	0.1388			1.3	0.1403	0.141	0.119
1.4	0.143	0.1534	0.1457			1.4	0.1464	0.1483	0.1218
1.5	0.1485	0.1618	0.1534			1.5	0.1528	0.1555	0.1246
1.6	0.1536	0.1704	0.1609			1.6	0.1595	0.1631	0.1269
1.7	0.1589	0.1794	0.1693			1.7	0.1657	0.171	0.1302
1.8	0.1643	0.1894	0.1776			1.8	0.1714	0.1796	0.1324
1.9	0.1697	0.2014	0.1856			1.9	0.1777	0.1878	0.1349
2	0.1751	0.2086	0.1935			2	0.1848	0.197	0.1374
2.1	0.1807	0.2179	0.2022			2.1	0.1923	0.2056	0.14
2.2	0.187	0.228	0.211			2.2	0.198	0.2146	0.1424
2.3	0.1921	0.2378	0.2202			2.3	0.2053	0.2236	0.1447
2.4	0.198	0.2483	0.2291			2.4	0.2122	0.2333	0.1472
2.5	0.2038	0.2588	0.2386			2.5	0.2197	0.243	0.1502
2.6	0.21	0.2698	0.2478			2.6	0.2272	0.2524	0.1528
2.7	0.216	0.2806	0.2574			2.7	0.2349	0.2621	0.1552
2.8	0.222	0.2913	0.2679			2.8	0.2427	0.2726	0.1577
2.9	0.2284	0.3027	0.2773			2.9	0.2506	0.2827	0.161
3	0.2346	0.314	0.2867			3	0.2586	0.2932	0.1633

## Sheet: A fumigatus
	Lipase activity
	Spectrophotometric methods
	Date: 26/01/2015
	Time fermentation: 48 h
		Moisture (%)		pH			alfa average	A (U/mL)	U/g
		Initial	Final	Initial	Final		0.138933	0.878128	5.07393							U/g
		65.07	62.91	5.63	8.25											5.07393
																6.03803
	Sample 1														Average	5.55598
	Time	A1	A2	A3											Deviation	0.681719
	0
	0.1
	0.2
	0.3
	0.4
	0.5															Initial		Final
	0.6	0.1555	0.1355	0.1382												Moisture	pH	Moisture	pH
	0.7	0.17	0.1529	0.1583												65.07	5.63	62.91	8.25
	0.8	0.185	0.1703	0.1771												65.33	5.6	61.25	7.65
	0.9	0.1997	0.1878	0.1951											Average	65.2	5.615	62.08	7.95
	1	0.2108	0.2026	0.2133											Deviation	0.183848	0.0212132	1.1738	0.424264
	1.1	0.2241	0.2188	0.2311
	1.2	0.238	0.2349	0.2489
	1.3	0.2498	0.2509	0.2662
	1.4	0.2626	0.2662	0.2836
	1.5	0.2749	0.2809	0.3005
	1.6	0.2869	0.2954	0.3177
	1.7	0.2983	0.3102	0.334
	1.8	0.3097	0.3247	0.3502
	1.9	0.3212	0.3389	0.3678
	2	0.3325	0.3527	0.3824				Average (U/g)
	2.1	0.3434	0.3666	0.3975				5.555
	2.2	0.354	0.3796	0.4124
	2.3	0.3639	0.3928	0.4274
	2.4	0.3735	0.4061	0.4418
	2.5	0.3834	0.4189	0.4557
	2.6	0.3929	0.4315	0.4698
	2.7	0.4023	0.4433	0.4836
	2.8	0.4118	0.4554	0.4973
	2.9	0.421	0.4667	0.5107
	3	0.43	0.4784	0.5238
	Sample 2
		Moisture (%)		pH				alfa average	A (U/mL)	U/g
		Initial	Final	Initial	Final			0.163167	1.03129	6.03803
		65.33	61.25	5.6	7.65
	Time	A1	A2	A3
	0
	0.1
	0.2
	0.3
	0.4
	0.5
	0.6	0.1368	0.1395	0.1296
	0.7	0.1534	0.1604	0.1488
	0.8	0.1707	0.1796	0.1687
	0.9	0.187	0.2001	0.1885
	1	0.2015	0.221	0.208
	1.1	0.2189	0.2375	0.2268
	1.2	0.2344	0.2562	0.246
	1.3	0.2493	0.2748	0.2645
	1.4	0.2643	0.2932	0.2831
	1.5	0.2794	0.311	0.3016
	1.6	0.294	0.3289	0.3203
	1.7	0.3083	0.3466	0.3375
	1.8	0.3227	0.3639	0.3557
	1.9	0.3365	0.3811	0.3726
	2	0.3504	0.3982	0.3896
	2.1	0.3639	0.4151	0.4066
	2.2	0.3776	0.4319	0.4232
	2.3	0.3904	0.448	0.4397
	2.4	0.4036	0.4641	0.4563
	2.5	0.4159	0.48	0.4724
	2.6	0.4285	0.4956	0.4888
	2.7	0.4404	0.5109	0.5041
	2.8	0.4523	0.5263	0.5204
	2.9	0.4643	0.5408	0.535
	3	0.4757	0.5552	0.5499

## Sheet: A terreus
	Lipase activity
	Spectrophotometric methods
	Date: 26/01/2015
	Time fermentation: 48 h
		Moisture (%)		pH			alfa average	A (U/mL)	U/g
		Initial	Final	Initial	Final		0.0754	0.476566	2.73888
		64.82	61.59	5.59	7.46
	Sample 3														U/g
	Time	A1	A2	A3											2.73888
	0														2.14348
	0.1													Average	2.44118
	0.2													Deviation	0.42101
	0.3
	0.4
	0.5	0.0959	0.0866	0.0848
	0.6	0.1023	0.0938	0.0907
	0.7	0.1079	0.1002	0.0976											Initial		Final
	0.8	0.1141	0.1073	0.1041											Moisture	pH	Moisture	pH
	0.9	0.1195	0.115	0.1113											64.82	5.59	61.59	7.46
	1	0.1234	0.1234	0.1178											65.22	5.63	59.37	7.55
	1.1	0.129	0.1298	0.1244										Average	65.02	5.61	60.48	7.505
	1.2	0.133	0.1374	0.1313										Deviation	0.282843	0.0282843	1.56978	0.0636396
	1.3	0.138	0.1451	0.1388
	1.4	0.143	0.1534	0.1457
	1.5	0.1485	0.1618	0.1534
	1.6	0.1536	0.1704	0.1609
	1.7	0.1589	0.1794	0.1693
	1.8	0.1643	0.1894	0.1776
	1.9	0.1697	0.2014	0.1856
	2	0.1751	0.2086	0.1935
	2.1	0.1807	0.2179	0.2022
	2.2	0.187	0.228	0.211
	2.3	0.1921	0.2378	0.2202
	2.4	0.198	0.2483	0.2291
	2.5	0.2038	0.2588	0.2386
	2.6	0.21	0.2698	0.2478
	2.7	0.216	0.2806	0.2574
	2.8	0.222	0.2913	0.2679
	2.9	0.2284	0.3027	0.2773
	3	0.2346	0.314	0.2867
	Sample 4
		Moisture (%)		pH				alfa average	A (U/mL)	U/g
		Initial	Final	Initial	Final			0.0578333	0.365536	2.14348
		65.22	59.37	5.63	7.55
	time	A1	A2	A3
	0
	0.1
	0.2
	0.3
	0.4
	0.5
	0.6	0.0991	0.0957	0.1011
	0.7	0.1055	0.1018	0.1042
	0.8	0.1116	0.1087	0.1065
	0.9	0.1181	0.1144	0.1091
	1	0.1235	0.1208	0.1116
	1.1	0.1294	0.1272	0.1141
	1.2	0.1348	0.1338	0.117
	1.3	0.1403	0.141	0.119
	1.4	0.1464	0.1483	0.1218
	1.5	0.1528	0.1555	0.1246
	1.6	0.1595	0.1631	0.1269
	1.7	0.1657	0.171	0.1302
	1.8	0.1714	0.1796	0.1324
	1.9	0.1777	0.1878	0.1349
	2	0.1848	0.197	0.1374
	2.1	0.1923	0.2056	0.14
	2.2	0.198	0.2146	0.1424
	2.3	0.2053	0.2236	0.1447
	2.4	0.2122	0.2333	0.1472
	2.5	0.2197	0.243	0.1502
	2.6	0.2272	0.2524	0.1528
	2.7	0.2349	0.2621	0.1552
	2.8	0.2427	0.2726	0.1577
	2.9	0.2506	0.2827	0.161
	3	0.2586	0.2932	0.1633
