# Supplementary material for: Obtaining filamentous fungi and lipases from sewage treatment plant residue for fat degradation in anaerobic reactors
Source: PeerJ. 2018 Aug 14;6:e5368. doi: 10.7717/peerj.5368 (PMC6097491; doi:10.7717/peerj.5368)
Supplement: Supplemental Information 9 — Lipase activity by titration methods. [file peerj-06-5368-s009.xlsx]

## Sheet: A. fumigatus
	Lipase activity
	Titration methods
	Date: 26/01/2015
	Time fermentation: 48 h
								Moisture			Mass
	Samples	Volume NaOH (mL)			Lipase activity (U/mL)	Lipase activity (U/g)		Initial (%)	Final (%)		Initial	Final
1	B1	16		1				65.07	62.91		14.1267	12.977
	A1	15.5		2	3.2	18.4943
				3	4.26667	24.6591
	Samples	Volume NaOH (mL)				21.5767
2	B2	14.4				4.35915
	A2	15.6
	Samples	Volume NaOH (mL)
3	B3	14.5
	A3	16.1

## Sheet: A. terreus
	Lipase activity
	Titration methods
	Date: 26/01/2015
	Time fermentation: 48 h
	Samples	Volume NaOH (mL)			Lipase activity (U/mL)	Lipase activity (U/g)
1	B1	15		1	4	23.2022
	A1	16.5		2	2.66667	15.4682
				3	2.93333	17.015		Moisture			Mass
								Initial (%)	Final (%)		Initial	Final
	Samples	Volume NaOH (mL)				18.5618		64.82	61.59		14.1205	12.9298
2	B2	15				4.09249
	A2	16
	Samples	Volume NaOH (mL)
3	B3	14
	A3	15.1
