# Supplementary material for: Obtaining filamentous fungi and lipases from sewage treatment plant residue for fat degradation in anaerobic reactors
Source: PeerJ. 2018 Aug 14;6:e5368. doi: 10.7717/peerj.5368 (PMC6097491; doi:10.7717/peerj.5368)
Supplement: Supplemental Information 10 — Results of Hydrolysis Index quantification. [file peerj-06-5368-s010.xlsx]

## Sheet: Plan1
	Hydrolysis Index					Dt	Total diameter
						Dc	Colony diameter
	Date: 18/08/2014					HI	Hydrolysis Index
													Strains	Total diameter (mm)	Colony diameter (mm)	Hydrolysis Index (IH)
	M15				M7				M22				M5	12	8	1.5
	Dt (cm)	Dc (cm)	HI		Dt (cm)	Dc (cm)	HI		Dt (cm)	Dc (cm)	HI		M7	51	49	1.04082
	3.5	2.3	1.52174		5.1	4.9	1.04082		1.5	1.4	1.07143		M11	46	44	1.04545
													M13	30	20	1.5
	M1				M13				M21				M20	17	15	1.13333
	Dt (cm)	Dc (cm)	HI		Dt (cm)	Dc (cm)	HI		Dt (cm)	Dc (cm)	HI		M21	11	9	1.22222
	4.2	2	2.1		3	2	1.5		1.1	0.9	1.22222		M22	15	14	1.07143
													M24	53	48	1.10417
	M5				M24
	Dt (cm)	Dc (cm)	HI		Dt (cm)	Dc (cm)	HI
	1.2	0.8	1.5		5.3	4.8	1.10417
	M11				M20
	Dt (cm)	Dc (cm)	HI		Dt (cm)	Dc (cm)	HI
	4.6	4.4	1.04545		1.7	1.5	1.13333
	cm	mm		cm	mm		cm	mm
M15	1.2	12	M7	0.2	2	M21	0.1	1
M1	2.2	22	M13	1	10	M22	0.2	2
M5	0.4	4	M24	0.5	5
M11	0.2	2	M20	0.2	2
