# Supplementary material for: Obtaining filamentous fungi and lipases from sewage treatment plant residue for fat degradation in anaerobic reactors
Source: PeerJ. 2018 Aug 14;6:e5368. doi: 10.7717/peerj.5368 (PMC6097491; doi:10.7717/peerj.5368)
Supplement: Supplemental Information 11 — Profile of lipase activity, pH, and moisture during SSF of A. fumigatus and A. terreus. [file peerj-06-5368-s011.xlsx]

## Sheet: Resultados
		1				2				3						4					5					6					7					8
	0	0.0013	0.0038	0.0026		0.0016	-0.0075	0.0016		0	0.0022	0.0024	0.0021	0.0013		0	0.0036	0.0098	0.0087		0	0.0045	-0.0039	0.0031		0	0.0125	0.0026	-0.003		0	-0.0104	-0.0194	0.0084		0	0.0026	0.0024	0.0061
	0.1	0.0025	0.0056	0.004		0.0039	-0.0076	0.0046		0.1	0.0032	0.0047	0.0048	0.002		0.1	0.0038	0.0108	0.0105		0.1	0.0063	0	0.0019		0.1	0.0043	0.0032	0.0006		0.1	-0.011	-0.0121	0.0065		0.1	0.0013	0.0039	0.0049
	0.2	0.003	0.0079	0.0046		0.0057	-0.0067	0.0066		0.2	0.0044	0.007	0.0066	0.0028		0.2	0.003	0.012	0.0122		0.2	0.0004	0.0033	-0.0032		0.2	0.0008	0.0179	0.0114		0.2	-0.0049	-0.0119	0.0163		0.2	0.0104	-0.0037	-0.0019
	0.3	-0.2726	-0.3081	-0.2214		-1.0513	-0.3199	-0.2239		0.3	0.0055	-1.0771	-1.0857	-1.1277		0.3	-0.612	-0.0464	-1.0818		0.3	-1.2152	-1.343	-0.6306		0.3	-0.4454	-1.1896	-0.5242		0.3	-1.4704	-1.0525	-1.3649		0.3	-1.6476	-1.3666	-1.3329
	0.4	-0.2729	-0.2418	-0.2216		-0.2009	-0.2516	-0.2242		0.4	-0.8651	-0.1886	-0.2222	-0.2701		0.4	-0.3855	-0.2179	-0.2116		0.4	-0.3942	-0.4753	-0.5292		0.4	-0.4462	-0.6975	-0.5241		0.4	-0.5506	-0.5011	-0.5077		0.4	-0.5857	-0.5175	-0.4848
	0.5	0.1072	0.0859	0.1012		0.1237	-0.2516	0.1076		0.5	-0.1885	-0.1888	-0.1987	0.1294		0.5	-0.42	-1.0739	-0.2114		0.5	-1.2245	0.1479	0.1098		0.5	0.153	-0.7027	0.1063		0.5	-0.9813	-0.341	-1.3592		0.5	-1.5713	0.1328	-0.8126
	0.6	0.1092	0.0896	0.1046		0.1278	0.094	0.1122		0.6	-0.1888	-0.189	0.2265	0.1418		0.6	0.2499	0.2098	0.1698		0.6	0.1239	0.1559	0.1174		0.6	0.158	0.0742	0.112		0.6	0.1626	0.1607	0.1426		0.6	0.0916	0.1387	0.0972
	0.7	0.1093	0.0933	0.1091		0.1321	0.097	0.1162		0.7	-1.0664	-0.1328	0.2327	0.1546		0.7	0.2573	0.2291	0.1899		0.7	0.1354	0.1612	0.1243		0.7	0.163	0.0784	0.1172		0.7	0.1633	0.1625	0.1443		0.7	0.0947	0.1406	0.1024
	0.8	0.1135	0.0957	0.1119		0.1334	0.0996	0.1155		0.8	0.157	0.1765	0.2385	0.1663		0.8	0.2651	0.2482	0.2106		0.8	0.1434	0.1675	0.131		0.8	0.168	0.0807	0.1214		0.8	0.1651	0.1623	0.145		0.8	0.0972	0.142	0.107
	0.9	0.1149	0.097	0.111		0.1337	0.1004	0.115		0.9	0.1688	0.1895	0.2451	0.1782		0.9	0.273	0.2661	0.2297		0.9	0.151	0.1723	0.1359		0.9	0.1702	0.0826	0.1231		0.9	0.1662	0.1635	0.1446		0.9	0.0994	0.1453	0.109
	1	0.1172	0.0994	0.1129		0.1356	0.1018	0.1165		1	0.1811	0.2016	0.2516	0.1893		1	0.2801	0.2837	0.2488		1	0.1578	0.1773	0.1407		1	0.1737	0.0847	0.1266		1	0.1648	0.1646	0.1455		1	0.1019	0.1472	0.1123
	1.1	0.1191	0.1018	0.1155		0.1377	0.1042	0.1185		1.1	0.194	0.2135	0.258	0.2008		1.1	0.2866	0.3012	0.2668		1.1	0.1644	0.1829	0.1462		1.1	0.1777	0.0871	0.1301		1.1	0.1648	0.1654	0.1461		1.1	0.1045	0.1499	0.1158
	1.2	0.1224	0.1043	0.1173		0.1385	0.1059	0.1205		1.2	0.206	0.2251	0.2651	0.2114		1.2	0.2928	0.3181	0.2848		1.2	0.1717	0.1874	0.1517		1.2	0.1811	0.0892	0.1343		1.2	0.165	0.1661	0.1468		1.2	0.1066	0.1528	0.1188
	1.3	0.1223	0.1069	0.1199		0.1407	0.1082	0.1227		1.3	0.2177	0.2361	0.2691	0.2219		1.3	0.2982	0.3342	0.3028		1.3	0.1785	0.192	0.156		1.3	0.1846	0.0905	0.1374		1.3	0.1652	0.1671	0.1473		1.3	0.1092	0.1543	0.122
	1.4	0.1238	0.1092	0.1225		0.143	0.1106	0.1243		1.4	0.2292	0.2474	0.2737	0.2326		1.4	0.3038	0.3507	0.3201		1.4	0.1848	0.1963	0.1606		1.4	0.1875	0.0927	0.1408		1.4	0.1657	0.1677	0.1486		1.4	0.1121	0.1564	0.1252
	1.5	0.1247	0.1113	0.1251		0.1451	0.1122	0.1261		1.5	0.2401	0.2583	0.2803	0.2425		1.5	0.3091	0.3661	0.3373		1.5	0.1916	0.2004	0.1651		1.5	0.191	0.0945	0.1437		1.5	0.1667	0.1685	0.149		1.5	0.1137	0.1584	0.1282
	1.6	0.1259	0.1137	0.1269		0.1473	0.1147	0.1285		1.6	0.2513	0.2695	0.2855	0.253		1.6	0.3141	0.3812	0.3535		1.6	0.1983	0.2046	0.1696		1.6	0.1943	0.096	0.1471		1.6	0.1678	0.1693	0.1498		1.6	0.1161	0.16	0.131
	1.7	0.1276	0.1165	0.1294		0.1494	0.117	0.1301		1.7	0.2621	0.28	0.2912	0.2626		1.7	0.319	0.396	0.3695		1.7	0.2047	0.2087	0.1736		1.7	0.1971	0.0972	0.1501		1.7	0.1683	0.1702	0.1504		1.7	0.118	0.162	0.134
	1.8	0.1287	0.1185	0.1317		0.1514	0.1185	0.1322		1.8	0.2724	0.291	0.2985	0.272		1.8	0.3236	0.4106	0.3857		1.8	0.2109	0.2127	0.1779		1.8	0.2003	0.099	0.153		1.8	0.1686	0.1709	0.1509		1.8	0.1201	0.1639	0.137
	1.9	0.1316	0.1211	0.1337		0.1536	0.121	0.1339		1.9	0.283	0.3015	0.3076	0.2812		1.9	0.3278	0.4244	0.4		1.9	0.2174	0.2165	0.1815		1.9	0.2035	0.1001	0.1562		1.9	0.1696	0.172	0.1518		1.9	0.1221	0.166	0.1397
	2	0.1329	0.1234	0.1368		0.1557	0.1232	0.1367		2	0.293	0.3119	0.3173	0.2905		2	0.3319	0.4379	0.4152		2	0.2236	0.2194	0.1855		2	0.2064	0.1025	0.1587		2	0.1702	0.1727	0.1525		2	0.1239	0.1678	0.1425
	2.1	0.1354	0.1261	0.1387		0.1575	0.125	0.1386		2.1	0.3032	0.3228	0.3271	0.2993		2.1	0.3356	0.4509	0.4295		2.1	0.2297	0.2231	0.189		2.1	0.2087	0.104	0.1613		2.1	0.1715	0.1738	0.1531		2.1	0.1252	0.1697	0.1451
	2.2	0.1374	0.1285	0.1414		0.1594	0.127	0.1404		2.2	0.3133	0.333	0.3358	0.3082		2.2	0.3393	0.4636	0.4437		2.2	0.2352	0.2266	0.1925		2.2	0.212	0.1052	0.1639		2.2	0.1727	0.175	0.1535		2.2	0.1274	0.1716	0.1475
	2.3	0.1389	0.1305	0.1433		0.1618	0.1281	0.1423		2.3	0.323	0.3416	0.3441	0.3164		2.3	0.3429	0.476	0.4574		2.3	0.2414	0.2298	0.1959		2.3	0.2144	0.1062	0.1668		2.3	0.173	0.1756	0.1544		2.3	0.1292	0.1737	0.15
	2.4	0.1411	0.1325	0.1455		0.1636	0.1302	0.1441		2.4	0.3324	0.3505	0.3527	0.3251		2.4	0.3462	0.4882	0.4705		2.4	0.2468	0.233	0.1995		2.4	0.2176	0.1078	0.1695		2.4	0.1739	0.1764	0.1549		2.4	0.1311	0.1751	0.1528
	2.5	0.1435	0.1347	0.1478		0.1654	0.1321	0.1467		2.5	0.3418	0.3592	0.361	0.3335		2.5	0.3499	0.4996	0.4834		2.5	0.2526	0.236	0.2023		2.5	0.2202	0.1092	0.1718		2.5	0.175	0.1775	0.156		2.5	0.1327	0.1774	0.1551
	2.6	0.1462	0.1367	0.1501		0.167	0.1342	0.1482		2.6	0.3511	0.3681	0.3688	0.3414		2.6	0.3532	0.5108	0.4956		2.6	0.2581	0.239	0.2054		2.6	0.2229	0.1101	0.1745		2.6	0.1753	0.1782	0.1567		2.6	0.1344	0.1781	0.1575
	2.7	0.1481	0.1388	0.1518		0.1689	0.1364	0.1501		2.7	0.3601	0.3767	0.3766	0.3496		2.7	0.356	0.5215	0.5076		2.7	0.2637	0.2419	0.2085		2.7	0.2254	0.1108	0.1765		2.7	0.1761	0.1792	0.1576		2.7	0.1368	0.1797	0.1596
	2.8	0.15	0.1409	0.1545		0.1708	0.138	0.1516		2.8	0.3687	0.3855	0.3843	0.3573		2.8	0.3594	0.5318	0.5188		2.8	0.2686	0.2447	0.2118		2.8	0.2278	0.1119	0.1791		2.8	0.1769	0.1797	0.1578		2.8	0.1375	0.1811	0.162
	2.9	0.1518	0.1426	0.1562		0.173	0.1413	0.1534		2.9	0.3773	0.3932	0.3919	0.3647		2.9	0.362	0.5419	0.5299		2.9	0.2737	0.248	0.2144		2.9	0.2299	0.1129	0.1816		2.9	0.177	0.1811	0.1586		2.9	0.1389	0.1824	0.1641
	3	0.1538	0.1452	0.1575		0.1749	0.1417	0.1555		3	0.386	0.4015	0.3991	0.3722		3	0.3647	0.5514	0.541		3	0.2786	0.2504	0.2174		3	0.2319	0.1142	0.1838		3	0.1775	0.1819	0.1591		3	0.1411	0.1838	0.1663
	3.1			0.1596
		9				10				11						12					13						14					15						16
		-0.0027	-0.0003	0.005		-0.0003	-0.0011	0.0024		0	0.0014	0.0077	0.0113			0	0.0054				0	-0.0099	-0.0029	-0.0146			0	-0.0002	-0.008	0.0108		0	0.0035	-0.0126	-0.0036			0	0.0024	0.003	0.0068
		-0.0017	0.0029	0.0076		0.0033	0.0014	0		0.1	0.0023	0.0099	0.0131			0.1	0.0083				0.1	-0.0113	0.0013	-0.0083			0.1	0.0054	-0.0045	0.007		0.1	0.0096	-0.0026	-0.0047			0.1	0.002	0.0026	0.0056
		0.0025	0.0056	0.0101		0.0055	0.0048	0.0012		0.2	0.0032	0.0122	0.0146			0.2	0.0117				0.2	-0.0101	-0.0158	0.0009			0.2	0.0031	-0.0045	0.0111		0.2	0.0089	-0.0009	-0.0111			0.2	0.0025	0.0034	0.0015
		-0.2326	-0.2405	-0.2508		-0.2266	-0.2739	-0.3579		0.3	-1.2202	-1.1022	-1.4124			0.3	-1.1027				0.3	-0.5356	-1.4612	-1.3527			0.3	-0.5242	-1.4826	-0.6386		0.3	-1.4225	-0.6434	-0.5841			0.3	-0.3987	-0.4046	-0.4986
		-0.2936	-0.2407	-0.2509		-0.2264	-0.274	-0.3581		0.4	-0.2448	-0.2549	-0.3796			0.4	-0.2992				0.4	-0.5646	-0.6053	-0.5077			0.4	-0.5243	-0.6039	-0.4911		0.4	-0.566	-0.637	-0.584			0.4	-0.5944	-1.2734	-0.5761
		0.1367	0.1148	0.1214		0.1407	0.1165	-1.2035		0.5	0.1378	-1.2516	-0.3798			0.5	-0.2992				0.5	0.0211	-0.8125	0.1519			0.5	0.1645	0.1362	0.1245		0.5	-0.3235	0.0161	0.0678			0.5	0.1532	0.096	0.1413
		0.1433	0.1203	0.126		0.1459	0.1269	0.1131		0.6	0.1429	0.1761	0.2728			0.6	-1.1718				0.6	0.0242	0.0505	0.1552			0.6	0.1695	0.1401	0.1295		0.6	0.1277	0.0187	0.0731			0.6	0.1547	0.098	0.1433
		0.1496	0.1259	0.1329		0.1538	0.1317	0.1167		0.7	0.1469	0.1804	0.2763			0.7	0.2062				0.7	0.0268	0.0533	0.1571			0.7	0.1717	0.1428	0.1327		0.7	0.1301	0.0215	0.0776			0.7	0.1561	0.0992	0.1461
		0.1529	0.1337	0.1358		0.1513	0.1226	0.1149		0.8	0.1515	0.1849	0.2808			0.8	0.2077				0.8	0.0316	0.0557	0.1591			0.8	0.1765	0.1459	0.1381		0.8	0.1316	0.0237	0.0798			0.8	0.1577	0.102	0.1453
		0.1545	0.1341	0.1395		0.1528	0.1261	0.1131		0.9	0.1561	0.1892	0.2834			0.9	0.2113				0.9	0.0345	0.0583	0.1617			0.9	0.1791	0.1494	0.1413		0.9	0.1341	0.0273	0.0824			0.9	0.1595	0.1019	0.1457
		0.1587	0.1391	0.1433		0.1541	0.1268	0.1142		1	0.1609	0.1943	0.2856			1	0.211				1	0.0386	0.0617	0.1655			1	0.1799	0.152	0.1456		1	0.1369	0.0291	0.0861			1	0.1613	0.1032	0.1475
		0.1626	0.144	0.1473		0.1579	0.1295	0.1171		1.1	0.1656	0.1987	0.2892			1.1	0.212				1.1	0.0401	0.0635	0.1672			1.1	0.1831	0.1548	0.1499		1.1	0.1387	0.032	0.089			1.1	0.1623	0.1049	0.1488
		0.1668	0.1486	0.152		0.1611	0.1328	0.1202		1.2	0.1703	0.2038	0.2927			1.2	0.2136				1.2	0.0432	0.0662	0.1695			1.2	0.186	0.1578	0.1543		1.2	0.14	0.0346	0.0925			1.2	0.1633	0.1067	0.1498
		0.1713	0.1532	0.1567		0.1639	0.1353	0.1223		1.3	0.1754	0.2085	0.2954			1.3	0.2151				1.3	0.0451	0.0687	0.1722			1.3	0.1892	0.1609	0.1583		1.3	0.1428	0.0372	0.0957			1.3	0.1652	0.1079	0.1514
		0.1759	0.1579	0.1608		0.1676	0.1386	0.1252		1.4	0.1799	0.2132	0.2984			1.4	0.2164				1.4	0.0483	0.0709	0.1749			1.4	0.1921	0.1636	0.1625		1.4	0.1442	0.0396	0.0994			1.4	0.1667	0.1091	0.1528
		0.1798	0.1627	0.1648		0.1717	0.1413	0.127		1.5	0.1853	0.218	0.3013			1.5	0.2179				1.5	0.052	0.0735	0.1772			1.5	0.1958	0.1669	0.1668		1.5	0.1461	0.0424	0.1028			1.5	0.1681	0.1101	0.1544
		0.1845	0.1678	0.1693		0.1778	0.1449	0.1289		1.6	0.1906	0.223	0.3047			1.6	0.2196				1.6	0.0551	0.0766	0.1797			1.6	0.1992	0.1698	0.171		1.6	0.1479	0.0451	0.1068			1.6	0.1698	0.1114	0.1561
		0.1884	0.1724	0.1736		0.1771	0.1475	0.1313		1.7	0.1961	0.2288	0.3079			1.7	0.2206				1.7	0.058	0.0793	0.1823			1.7	0.2027	0.1727	0.1751		1.7	0.1501	0.0476	0.1099			1.7	0.1714	0.1126	0.1575
		0.1928	0.1775	0.1783		0.1802	0.1505	0.134		1.8	0.2013	0.2335	0.3113			1.8	0.2221				1.8	0.0616	0.082	0.1846			1.8	0.2059	0.1757	0.1797		1.8	0.1521	0.0508	0.1136			1.8	0.173	0.1155	0.1593
		0.1968	0.1821	0.1825		0.1828	0.1531	0.1365		1.9	0.2065	0.2387	0.3145			1.9	0.2235				1.9	0.064	0.0848	0.1875			1.9	0.2091	0.1786	0.1838		1.9	0.1542	0.0537	0.1184			1.9	0.1748	0.1154	0.1608
		0.2014	0.1867	0.1869		0.1862	0.1562	0.1385		2	0.2126	0.2441	0.318			2	0.2253				2	0.0672	0.0871	0.1905			2	0.2124	0.1816	0.1881		2	0.156	0.0561	0.121			2	0.1766	0.1164	0.1624
		0.2055	0.1914	0.1908		0.189	0.1589	0.1407		2.1	0.2187	0.2498	0.3211			2.1	0.2268				2.1	0.0715	0.0902	0.1933			2.1	0.2156	0.1847	0.1923		2.1	0.1584	0.0591	0.1245			2.1	0.1782	0.1176	0.1638
		0.2099	0.197	0.1953		0.1918	0.1619	0.1428		2.2	0.2246	0.2555	0.3245			2.2	0.2281				2.2	0.0739	0.0932	0.1957			2.2	0.2189	0.1875	0.1967		2.2	0.1604	0.0623	0.128			2.2	0.18	0.1188	0.1651
		0.2141	0.2008	0.1995		0.1951	0.1648	0.1453		2.3	0.2305	0.2609	0.3276			2.3	0.2291				2.3	0.0786	0.0958	0.1982			2.3	0.2225	0.1903	0.2011		2.3	0.1627	0.0651	0.1316			2.3	0.1816	0.1201	0.1664
		0.2183	0.2051	0.2037		0.1981	0.1679	0.1477		2.4	0.2361	0.2663	0.3305			2.4	0.2305				2.4	0.0814	0.0987	0.2006			2.4	0.2252	0.1935	0.205		2.4	0.1647	0.068	0.1353			2.4	0.1837	0.1215	0.1682
		0.2224	0.2101	0.209		0.2007	0.1708	0.1497		2.5	0.2422	0.272	0.3334			2.5	0.2309				2.5	0.0843	0.1013	0.2035			2.5	0.2293	0.1971	0.2094		2.5	0.1666	0.0706	0.1387			2.5	0.1852	0.1233	0.1699
		0.2263	0.2145	0.2126		0.2039	0.1736	0.1522		2.6	0.2486	0.2781	0.3365			2.6	0.2326				2.6	0.0871	0.1037	0.2057			2.6	0.2327	0.1999	0.2133		2.6	0.1688	0.0734	0.143			2.6	0.1867	0.1242	0.1707
		0.2308	0.2187	0.2169		0.2067	0.1765	0.1547		2.7	0.2549	0.2832	0.3399			2.7	0.2337				2.7	0.0902	0.1064	0.2087			2.7	0.236	0.2029	0.2174		2.7	0.1707	0.0763	0.1463			2.7	0.1881	0.126	0.1728
		0.2351	0.2233	0.2208		0.2095	0.1796	0.1571		2.8	0.2614	0.2895	0.3427			2.8	0.2355				2.8	0.094	0.1088	0.2113			2.8	0.2395	0.2061	0.2219		2.8	0.173	0.0792	0.1497			2.8	0.1901	0.1278	0.1739
		0.239	0.2279	0.2247		0.2124	0.1827	0.1593		2.9	0.2679	0.2957	0.3462			2.9	0.2367				2.9	0.0969	0.112	0.2142			2.9	0.2432	0.2094	0.2264		2.9	0.1745	0.082	0.1534			2.9	0.1919	0.1289	0.1753
		0.2431	0.2326	0.2288		0.216	0.1861	0.1618		3	0.2745	0.3019	0.3492			3	0.2378				3	0.1002	0.1148	0.2168			3	0.2463	0.2126	0.2304		3	0.1772	0.0849	0.1573			3	0.1932	0.1296	0.1769
		0.2472		0.233		0.2185	0.1882
		0.2516

## Sheet: 24h-A fumig
	Fungo: A. fumigatus
	Date: 19/11/2014
	Fraction: > 1,18 mm
		Moisture (%)		pH				alfa average	A (U/mL)	U/g
		Initial	Final	Initial	Final			0.021	0.132731	0.663652
		62.18	61.2	5.74	5.75
															average U/g
	Sample 1														0.625	0.0521415
	time	A1	A2	A3
	0
	0.1
	0.2
	0.3
	0.4															Final average
	0.5	0.1072	0.0859	0.1012											Moisture	60.87
	0.6	0.1092	0.0896	0.1046											Standart deviation	0.46669
	0.7	0.1093	0.0933	0.1091
	0.8	0.1135	0.0957	0.1119											pH	5.75
	0.9	0.1149	0.097	0.111											Standart deviation	0
	1	0.1172	0.0994	0.1129
	1.1	0.1191	0.1018	0.1155
	1.2	0.1224	0.1043	0.1173												Initial average
	1.3	0.1223	0.1069	0.1199											Moisture	62.925
	1.4	0.1238	0.1092	0.1225											Standart deviation	1.05359
	1.5	0.1247	0.1113	0.1251
	1.6	0.1259	0.1137	0.1269											pH	5.735
	1.7	0.1276	0.1165	0.1294											Standart deviation	0.005
	1.8	0.1287	0.1185	0.1317
	1.9	0.1316	0.1211	0.1337
	2	0.1329	0.1234	0.1368
	2.1	0.1354	0.1261	0.1387
	2.2	0.1374	0.1285	0.1414
	2.3	0.1389	0.1305	0.1433
	2.4	0.1411	0.1325	0.1455
	2.5	0.1435	0.1347	0.1478
	2.6	0.1462	0.1367	0.1501
	2.7	0.1481	0.1388	0.1518
	2.8	0.15	0.1409	0.1545
	2.9	0.1518	0.1426	0.1562
	3	0.1538	0.1452	0.1575
	Sample 2
		Umidade (%)		pH				Média alfa	A (U/mL)	U/g
		Inicial	Final	Inicial	Final			0.0186667	0.117983	0.589913
		63.67	60.54	5.73	5.75
	Time	A1	A2	A3
	0
	0.1
	0.2
	0.3
	0.4
	0.5	0.1237		0.1076
	0.6	0.1278	0.094	0.1122
	0.7	0.1321	0.097	0.1162
	0.8	0.1334	0.0996	0.1155
	0.9	0.1337	0.1004	0.115
	1	0.1356	0.1018	0.1165
	1.1	0.1377	0.1042	0.1185
	1.2	0.1385	0.1059	0.1205
	1.3	0.1407	0.1082	0.1227
	1.4	0.143	0.1106	0.1243
	1.5	0.1451	0.1122	0.1261
	1.6	0.1473	0.1147	0.1285
	1.7	0.1494	0.117	0.1301
	1.8	0.1514	0.1185	0.1322
	1.9	0.1536	0.121	0.1339
	2	0.1557	0.1232	0.1367
	2.1	0.1575	0.125	0.1386
	2.2	0.1594	0.127	0.1404
	2.3	0.1618	0.1281	0.1423
	2.4	0.1636	0.1302	0.1441
	2.5	0.1654	0.1321	0.1467
	2.6	0.167	0.1342	0.1482
	2.7	0.1689	0.1364	0.1501
	2.8	0.1708	0.138	0.1516
	2.9	0.173	0.1413	0.1534
	3	0.1749	0.1417	0.1555

## Sheet: 48h-A fumig
	Fungus: A. fumigatus
	Date: 20/11/2014
	Fraction: > 1,18 mm
		Moisture (%)		pH				alfa average	A (U/mL)	U/g
		Initial	Final	Initial	Final			0.0993333	0.627836	3.13918
		65.54	59.61	5.77	8.04										average U/g
															3.91	1.08752
	Sample 3
	Time	A1	A2	A3	A4
	0
	0.1
	0.2
	0.3															Final average
	0.4														Moisture	56.86
	0.5														Standart deviation	3.88909
	0.6
	0.7														pH	8.12
	0.8	0.157	0.1765	0.2385	0.1663										Standart deviation	0.113137
	0.9	0.1688	0.1895	0.2451	0.1782
	1	0.1811	0.2016	0.2516	0.1893
	1.1	0.194	0.2135	0.258	0.2008
	1.2	0.206	0.2251	0.2651	0.2114
	1.3	0.2177	0.2361	0.2691	0.2219
	1.4	0.2292	0.2474	0.2737	0.2326
	1.5	0.2401	0.2583	0.2803	0.2425
	1.6	0.2513	0.2695	0.2855	0.253
	1.7	0.2621	0.28	0.2912	0.2626
	1.8	0.2724	0.291	0.2985	0.272
	1.9	0.283	0.3015	0.3076	0.2812
	2	0.293	0.3119	0.3173	0.2905
	2.1	0.3032	0.3228	0.3271	0.2993
	2.2	0.3133	0.333	0.3358	0.3082
	2.3	0.323	0.3416	0.3441	0.3164
	2.4	0.3324	0.3505	0.3527	0.3251
	2.5	0.3418	0.3592	0.361	0.3335
	2.6	0.3511	0.3681	0.3688	0.3414
	2.7	0.3601	0.3767	0.3766	0.3496
	2.8	0.3687	0.3855	0.3843	0.3573
	2.9	0.3773	0.3932	0.3919	0.3647
	3	0.386	0.4015	0.3991	0.3722
	Sample 4
		Moisture (%)		pH				Média alfa	A (U/mL)	U/g
		Inicial	Final	Inicial	Final			0.148	0.935434	4.67717
		64.56	54.11	5.72	8.2
	Time	A1	A2	A3
	0
	0.1
	0.2
	0.3
	0.4
	0.5
	0.6	0.2499	0.2098	0.1698
	0.7	0.2573	0.2291	0.1899
	0.8	0.2651	0.2482	0.2106
	0.9	0.273	0.2661	0.2297
	1	0.2801	0.2837	0.2488
	1.1	0.2866	0.3012	0.2668
	1.2	0.2928	0.3181	0.2848
	1.3	0.2982	0.3342	0.3028
	1.4	0.3038	0.3507	0.3201
	1.5	0.3091	0.3661	0.3373
	1.6	0.3141	0.3812	0.3535
	1.7	0.319	0.396	0.3695
	1.8	0.3236	0.4106	0.3857
	1.9	0.3278	0.4244	0.4
	2	0.3319	0.4379	0.4152
	2.1	0.3356	0.4509	0.4295
	2.2	0.3393	0.4636	0.4437
	2.3	0.3429	0.476	0.4574
	2.4	0.3462	0.4882	0.4705
	2.5	0.3499	0.4996	0.4834
	2.6	0.3532	0.5108	0.4956
	2.7	0.356	0.5215	0.5076
	2.8	0.3594	0.5318	0.5188
	2.9	0.362	0.5419	0.5299
	3	0.3647	0.5514	0.541

## Sheet: 72h-A fumig
	Fungus: A. fumigatus
	Date: 21/11/2014
	Fraction: > 1,18 mm
		Moisture (%)		pH			alfa average	A (U/mL)	U/g
		Inicial	Final	Inicial	Final		0.047	0.297063	1.48532
		63.61	51.14	5.74	8.21
														average U/g
	Sample 5													1.145	0.484171
	Time	A1	A2	A3
	0
	0.1
	0.2
	0.3
	0.4														Final average
	0.5													Moisture	52.74
	0.6	0.1239	0.1559	0.1174										Standart deviation	2.26274
	0.7	0.1354	0.1612	0.1243
	0.8	0.1434	0.1675	0.131										pH	8.28
	0.9	0.151	0.1723	0.1359										Standart deviation	0.0989949
	1	0.1578	0.1773	0.1407
	1.1	0.1644	0.1829	0.1462
	1.2	0.1717	0.1874	0.1517
	1.3	0.1785	0.192	0.156
	1.4	0.1848	0.1963	0.1606
	1.5	0.1916	0.2004	0.1651
	1.6	0.1983	0.2046	0.1696
	1.7	0.2047	0.2087	0.1736
	1.8	0.2109	0.2127	0.1779
	1.9	0.2174	0.2165	0.1815
	2	0.2236	0.2194	0.1855
	2.1	0.2297	0.2231	0.189
	2.2	0.2352	0.2266	0.1925
	2.3	0.2414	0.2298	0.1959
	2.4	0.2468	0.233	0.1995
	2.5	0.2526	0.236	0.2023
	2.6	0.2581	0.239	0.2054
	2.7	0.2637	0.2419	0.2085
	2.8	0.2686	0.2447	0.2118
	2.9	0.2737	0.248	0.2144
	3	0.2786	0.2504	0.2174
	Sample 6
		Moisture (%)		pH			alfa average	A (U/mL)	U/g
		Inicial	Final	Inicial	Final		0.0253333	0.160119	0.800597
		64.97	54.34	5.71	8.35
	Time	A1	A2	A3
	0
	0.1
	0.2
	0.3
	0.4
	0.5	0.153		0.1063
	0.6	0.158	0.0742	0.112
	0.7	0.163	0.0784	0.1172
	0.8	0.168	0.0807	0.1214
	0.9	0.1702	0.0826	0.1231
	1	0.1737	0.0847	0.1266
	1.1	0.1777	0.0871	0.1301
	1.2	0.1811	0.0892	0.1343
	1.3	0.1846	0.0905	0.1374
	1.4	0.1875	0.0927	0.1408
	1.5	0.191	0.0945	0.1437
	1.6	0.1943	0.096	0.1471
	1.7	0.1971	0.0972	0.1501
	1.8	0.2003	0.099	0.153
	1.9	0.2035	0.1001	0.1562
	2	0.2064	0.1025	0.1587
	2.1	0.2087	0.104	0.1613
	2.2	0.212	0.1052	0.1639
	2.3	0.2144	0.1062	0.1668
	2.4	0.2176	0.1078	0.1695
	2.5	0.2202	0.1092	0.1718
	2.6	0.2229	0.1101	0.1745
	2.7	0.2254	0.1108	0.1765
	2.8	0.2278	0.1119	0.1791
	2.9	0.2299	0.1129	0.1816
	3	0.2319	0.1142	0.1838

## Sheet: 24h-Aterreus
	Fungus: A. terreus
	Date: 19/11/2014
	Fraction: > 1,18 mm
		Moisture (%)		pH			alfa average	A (U/mL)	U/g					average U/g
		Initial	Final	Initial	Final		0.043	0.271782	1.35891					1.08	0.394785
		67.07	67.19	5.79	6.27
	Sample 9
	Time	A1	A2	A3
	0
	0.1														Final average
	0.2													Moisture	64.915
	0.3													Standart deviation	3.21734
	0.4
	0.5	0.1367	0.1148	0.1214										pH	6.195
	0.6	0.1433	0.1203	0.126										Standart deviation	0.106066
	0.7	0.1496	0.1259	0.1329
	0.8	0.1529	0.1337	0.1358
	0.9	0.1545	0.1341	0.1395
	1	0.1587	0.1391	0.1433											Initial average
	1.1	0.1626	0.144	0.1473										Moisture	65.92
	1.2	0.1668	0.1486	0.152										Standart deviation	1.62635
	1.3	0.1713	0.1532	0.1567
	1.4	0.1759	0.1579	0.1608										pH	5.8
	1.5	0.1798	0.1627	0.1648										Standart deviation	0.0141421
	1.6	0.1845	0.1678	0.1693
	1.7	0.1884	0.1724	0.1736
	1.8	0.1928	0.1775	0.1783
	1.9	0.1968	0.1821	0.1825
	2	0.2014	0.1867	0.1869
	2.1	0.2055	0.1914	0.1908
	2.2	0.2099	0.197	0.1953
	2.3	0.2141	0.2008	0.1995
	2.4	0.2183	0.2051	0.2037
	2.5	0.2224	0.2101	0.209
	2.6	0.2263	0.2145	0.2126
	2.7	0.2308	0.2187	0.2169
	2.8	0.2351	0.2233	0.2208
	2.9	0.239	0.2279	0.2247
	3	0.2431	0.2326	0.2288
		0.2472		0.233
		0.2516
		Umidade (%)		pH			Média alfa	A (U/mL)	U/g
		Inicial	Final	Inicial	Final		0.0253333	0.160119	0.800597
		64.77	62.64	5.81	6.12
	Sample 10
	Time	A1	A2	A3
	0
	0.1
	0.2
	0.3
	0.4
	0.5
	0.6	0.1459	0.1269	0.1131
	0.7	0.1538	0.1317	0.1167
	0.8	0.1513	0.1226	0.1149
	0.9	0.1528	0.1261	0.1131
	1	0.1541	0.1268	0.1142
	1.1	0.1579	0.1295	0.1171
	1.2	0.1611	0.1328	0.1202
	1.3	0.1639	0.1353	0.1223
	1.4	0.1676	0.1386	0.1252
	1.5	0.1717	0.1413	0.127
	1.6	0.1778	0.1449	0.1289
	1.7	0.1771	0.1475	0.1313
	1.8	0.1802	0.1505	0.134
	1.9	0.1828	0.1531	0.1365
	2	0.1862	0.1562	0.1385
	2.1	0.189	0.1589	0.1407
	2.2	0.1918	0.1619	0.1428
	2.3	0.1951	0.1648	0.1453
	2.4	0.1981	0.1679	0.1477
	2.5	0.2007	0.1708	0.1497
	2.6	0.2039	0.1736	0.1522
	2.7	0.2067	0.1765	0.1547
	2.8	0.2095	0.1796	0.1571
	2.9	0.2124	0.1827	0.1593
	3	0.216	0.1861	0.1618
		0.2185	0.1882

## Sheet: 48H Aterreus
	Fungus: A. terreus
	Date: 19/11/2014
	Fraction: > 1,18 mm
		Moisture (%)		pH			alfa average	A (U/mL)	U/g					average U/g
		Initial	Final	Initial	Final		0.0456667	0.288636	1.44318					1.12189	0.454376
		66.67	62.86	5.82	5.99
	Sample 11
	Time	A1	A2	A3
	0
	0.1														Final average
	0.2													Moisture	69.835
	0.3													Standart deviation	9.86414
	0.4
	0.5													pH	7.22
	0.6	0.1429	0.1761	0.2728										Standart deviation	1.73948
	0.7	0.1469	0.1804	0.2763
	0.8	0.1515	0.1849	0.2808
	0.9	0.1561	0.1892	0.2834
	1	0.1609	0.1943	0.2856
	1.1	0.1656	0.1987	0.2892
	1.2	0.1703	0.2038	0.2927
	1.3	0.1754	0.2085	0.2954
	1.4	0.1799	0.2132	0.2984
	1.5	0.1853	0.218	0.3013
	1.6	0.1906	0.223	0.3047
	1.7	0.1961	0.2288	0.3079
	1.8	0.2013	0.2335	0.3113
	1.9	0.2065	0.2387	0.3145
	2	0.2126	0.2441	0.318
	2.1	0.2187	0.2498	0.3211
	2.2	0.2246	0.2555	0.3245
	2.3	0.2305	0.2609	0.3276
	2.4	0.2361	0.2663	0.3305
	2.5	0.2422	0.272	0.3334
	2.6	0.2486	0.2781	0.3365
	2.7	0.2549	0.2832	0.3399
	2.8	0.2614	0.2895	0.3427
	2.9	0.2679	0.2957	0.3462
	3	0.2745	0.3019	0.3492
		Moisture (%)		pH			alfa average	A (U/mL)	U/g
		Initial	Final	Initial	Final		0.0253333	0.160119	0.800597
		76.08	76.81	5.92	8.45
	Sample 12
	Time	A1	A2	A3
	0
	0.1
	0.2
	0.3
	0.4
	0.5
	0.6
	0.7
	0.8
	0.9
	1
	1.1
	1.2
	1.3
	1.4
	1.5
	1.6
	1.7
	1.8
	1.9
	2
	2.1
	2.2
	2.3
	2.4
	2.5
	2.6
	2.7
	2.8
	2.9
	3

## Sheet: 72HAterreus
	Fungus: A. terreus
	Date: 19/11/2014
	Fraction: > 1,18 mm
														average U/g
		Moisture (%)		pH			alfa average	A (U/mL)	U/g					0.979677	0.163873
		Initial	Final	Initial	Final		0.0273333	0.17276	0.863802
		65.78	56.67	5.82	8.75
	Sample 13
	Tempo	A1	A2	A3
	0														Final average
	0.1													Moisture	56.895
	0.2													Standart deviation	0.318198
	0.3
	0.4													pH	8.62
	0.5	0.0211		0.1519										Standart deviation	0.183848
	0.6	0.0242	0.0505	0.1552
	0.7	0.0268	0.0533	0.1571
	0.8	0.0316	0.0557	0.1591
	0.9	0.0345	0.0583	0.1617
	1	0.0386	0.0617	0.1655
	1.1	0.0401	0.0635	0.1672
	1.2	0.0432	0.0662	0.1695
	1.3	0.0451	0.0687	0.1722
	1.4	0.0483	0.0709	0.1749
	1.5	0.052	0.0735	0.1772
	1.6	0.0551	0.0766	0.1797
	1.7	0.058	0.0793	0.1823
	1.8	0.0616	0.082	0.1846
	1.9	0.064	0.0848	0.1875
	2	0.0672	0.0871	0.1905
	2.1	0.0715	0.0902	0.1933
	2.2	0.0739	0.0932	0.1957
	2.3	0.0786	0.0958	0.1982
	2.4	0.0814	0.0987	0.2006
	2.5	0.0843	0.1013	0.2035
	2.6	0.0871	0.1037	0.2057
	2.7	0.0902	0.1064	0.2087
	2.8	0.094	0.1088	0.2113
	2.9	0.0969	0.112	0.2142
	3	0.1002	0.1148	0.2168
		Moisture (%)		pH			alfa average	A (U/mL)	U/g
		Inicial	Final	Inicial	Final		0.0346667	0.219111	1.09555
		65.56	57.12	5.85	8.49
	Sample 14
	Tempo	A1	A2	A3
	0
	0.1
	0.2
	0.3
	0.4
	0.5	0.1645	0.1362	0.1245
	0.6	0.1695	0.1401	0.1295
	0.7	0.1717	0.1428	0.1327
	0.8	0.1765	0.1459	0.1381
	0.9	0.1791	0.1494	0.1413
	1	0.1799	0.152	0.1456
	1.1	0.1831	0.1548	0.1499
	1.2	0.186	0.1578	0.1543
	1.3	0.1892	0.1609	0.1583
	1.4	0.1921	0.1636	0.1625
	1.5	0.1958	0.1669	0.1668
	1.6	0.1992	0.1698	0.171
	1.7	0.2027	0.1727	0.1751
	1.8	0.2059	0.1757	0.1797
	1.9	0.2091	0.1786	0.1838
	2	0.2124	0.1816	0.1881
	2.1	0.2156	0.1847	0.1923
	2.2	0.2189	0.1875	0.1967
	2.3	0.2225	0.1903	0.2011
	2.4	0.2252	0.1935	0.205
	2.5	0.2293	0.1971	0.2094
	2.6	0.2327	0.1999	0.2133
	2.7	0.236	0.2029	0.2174
	2.8	0.2395	0.2061	0.2219
	2.9	0.2432	0.2094	0.2264
	3	0.2463	0.2126	0.2304

## Sheet: Cinética
		Kinetic 18-21/11/2014
	A. fumigatus									A. terreus
	Time (h)	Activity (U/g)	Deviation	Moisture (%)	deviation U (%)	pH	deviation pH			Time (h)	Activity (U/g)	Moisture (%)	pH	Deviation ativ.	Deviation U (%)	Deviation pH
	0	0		62.925	1.05359	5.74				0	0	65.92	5.8		1.62635	0.0141421
	24	0.63	0.0521415	60.87	0.46669	5.75	0			24	1.08	64.915	6.195	0.394785	3.21734	0.106066
	48	3.91	1.08752	56.86	3.88909	8.12	0.113137			48	1.12189	69.835	7.22	0.454376	9.86414	1.73948
	72	1.15	0.484171	52.74	2.26274	8.28	0.0989949			72	0.979677	56.895	8.62	0.163873	0.318198	0.183848
	M5								M13
