# Supplementary material for: Obtaining filamentous fungi and lipases from sewage treatment plant residue for fat degradation in anaerobic reactors
Source: PeerJ. 2018 Aug 14;6:e5368. doi: 10.7717/peerj.5368 (PMC6097491; doi:10.7717/peerj.5368)
Supplement: Supplemental Information 12 — Results of enzymatic hydrolysis tests with 1,500 mgL−1 O&G: free acids production and COD solubilization [file peerj-06-5368-s012.xlsx]

## Sheet: FA
		Date of analysis: 23 to 24/03/2015
		Date of fermentation (SEP): 06/03/2015				Normality of the solution NaOH		0.04
		Enzymatic activity of SEP: 12,53 U/g				Sample volume (mL)		10
		Mass of the SEP used: 2,8 g
		O&G (sewage+scum): 1575 mg/L
	1	Samples				Control
		Time (h)	Volume NaOH (mL)	Free acids (µmoles/mL)		Time (h)	Volume NaOH (mL)	Free acids (µmoles/mL)
		0	2.9	11.6		0	2.4	9.6
		2	4.9	19.6		2	2.2	8.8
		4	4	16		4	2	8
		6	4	16		6	2	8
		8	4	16		8	2	8
		24	5.8	23.2		24	3.6	14.4
			SAMPLES	CONTROL
		Time (h)	Volume NaOH (mL)	Free acids (µmoles/mL)
		0	11.6	9.6
		2	19.6	8.8
		4	16	8
		6	16	8
		8	16	8
		24	23.2	14.4
	2	Samples				Control
		Time (h)	Volume NaOH (mL)	Free acids (µmoles/mL)		Time (h)	Volume NaOH (mL)	Free acids (µmoles/mL)
		0	3	12		0	2.2	8.8
		2	4.2	16.8		2	2.4	9.6
		4	4	16		4	2	8
		6	4.4	17.6		6	2	8
		8	3.7	14.8		8	2.3	9.2
		24	4.6	18.4		24	3	12
			SAMPLES	CONTROL
		Time (h)	Volume NaOH (mL)	Free acids (µmoles/mL)
		0	12	8.8
		2	16.8	9.6
		4	16	8
		6	17.6	8
		8	14.8	9.2
		24	18.4	12

## Sheet: VFA Alk
	Date: 20/05/2015
	Normality H2SO4		0.18
	Normality NaOH		0.08
	Sample volume (mL)		50
	Time (h)	pH	Volume H2SO4 (mL)	Volume NaOH (mL)	Alkalinity (mg/L, as CaCO3)	Volatile Fatty Acids (mg/L, as HAc)
	0 control	5.75	1.8		702	763.2
		4.3	2.1
		3.3	0.6
		4		5.3
		7
	0	5.75	1.8		1098	1368
		4.3	4.3
		3.3	2.5
		4		9.5
		7
	4	5.75	2		1278	1396.8
		4.3	5.1
		3.3	2.5
		4		9.7
		7
	24	5.75	0.7		540	1094.4
		4.3	2.3
		3.3	2
		4		7.6
		7
